# Supplementary material for: Rare variants in drug target genes contributing to complex diseases, phenome-wide
Source: PubMed Central journal article supplement (PMC5854600; doi:10.1038/s41598-018-22834-4), 2018-03-15
Supplement: 41598_2018_22834_MOESM1_ESM.pdf [file 41598_2018_22834_MOESM1_ESM.pdf]

***Rare variants in drug target genes contributing to complex diseases, phenome-  
wide***

***Shefali Setia Verma<sup>1</sup>, Navya Josyula<sup>2</sup>, Anurag Verma<sup>1</sup>, Xinyuan Zhang<sup>2</sup>, Yogasudha Veturi<sup>1</sup>,  
Frederick E. Dewey<sup>4</sup>, Dustin N. Hartzel<sup>3</sup>, Daniel R. Lavage<sup>3</sup>, Joe Leader<sup>2,3</sup>, Marylyn D. Ritchie<sup>1</sup>,  
Sarah A. Pendergrass<sup>2\*</sup>***

## Supplementary Text:

### Additional Results:

Over 200 results were observed in each filter category. There were 25 results that showed Bonferroni significant associations with All Variants as well as with all functionally annotated filters. A total of 17 results were observed only in variants filtered by functional annotation before burden testing, not in all variants nor non-functionally annotated filtered variant based associations, highlighting the importance of functional annotation of specific variants in the associations. We observed 13 associations shared among functional annotation Filter 2 and 3, and 8 associations for functional annotation filter 2 and 3 only, which suggests the importance of the specific type of annotation filtering for those associations. The least overlap in various filtering approaches was between the non-functionally annotated -filtered data (no low frequency variants with putative functional impact) and the other filtering approaches. There were 37 gene-phenotype associations (among those with  $P\text{-value} < 0.001$ ) in both the non-functionally annotated filtered data and 'all variants'. There was one association shared across the non-functionally annotated filter based associations as well as functional annotation filter 3.

Next, we further inspected associations that were unique to each filtering approach. **Table** below provides the unique count of associations that are observed exclusively in each filtering category. We noted that among the annotation filtering approaches, the most significant as well as unique associations were observed in functional annotation filter 2 category (176).

**Table: Number of associations observed uniquely for each variant filtering approach, where results were not significant with  $P\text{-value} < 0.001$  in any other categories, shown with ascending order of count.**

| Filter Category                     | Count |
|-------------------------------------|-------|
| Non-functionally annotated Variants | 201   |
| Functional Annotation Filter 2      | 176   |
| All Variants                        | 88    |
| Functional Annotation Filter 3      | 72    |
| Functional Annotation Filter 1      | 63    |

## **Data Visualization**

Plot 2 and Supplementary figures 1, 2 and 3 are generated using circos perl package<sup>75</sup>.

Plots 10 and 12 are generated using UpSetR package in Shiny<sup>76</sup>.

Plots 11 and 13 are generated using Synthesis- View<sup>51</sup>

Plot 14 are generated using Phenogram package<sup>77</sup>

**Supplementary Figures:**

Supplementary Figure 1: Circos plot for Functional Filter 2 category

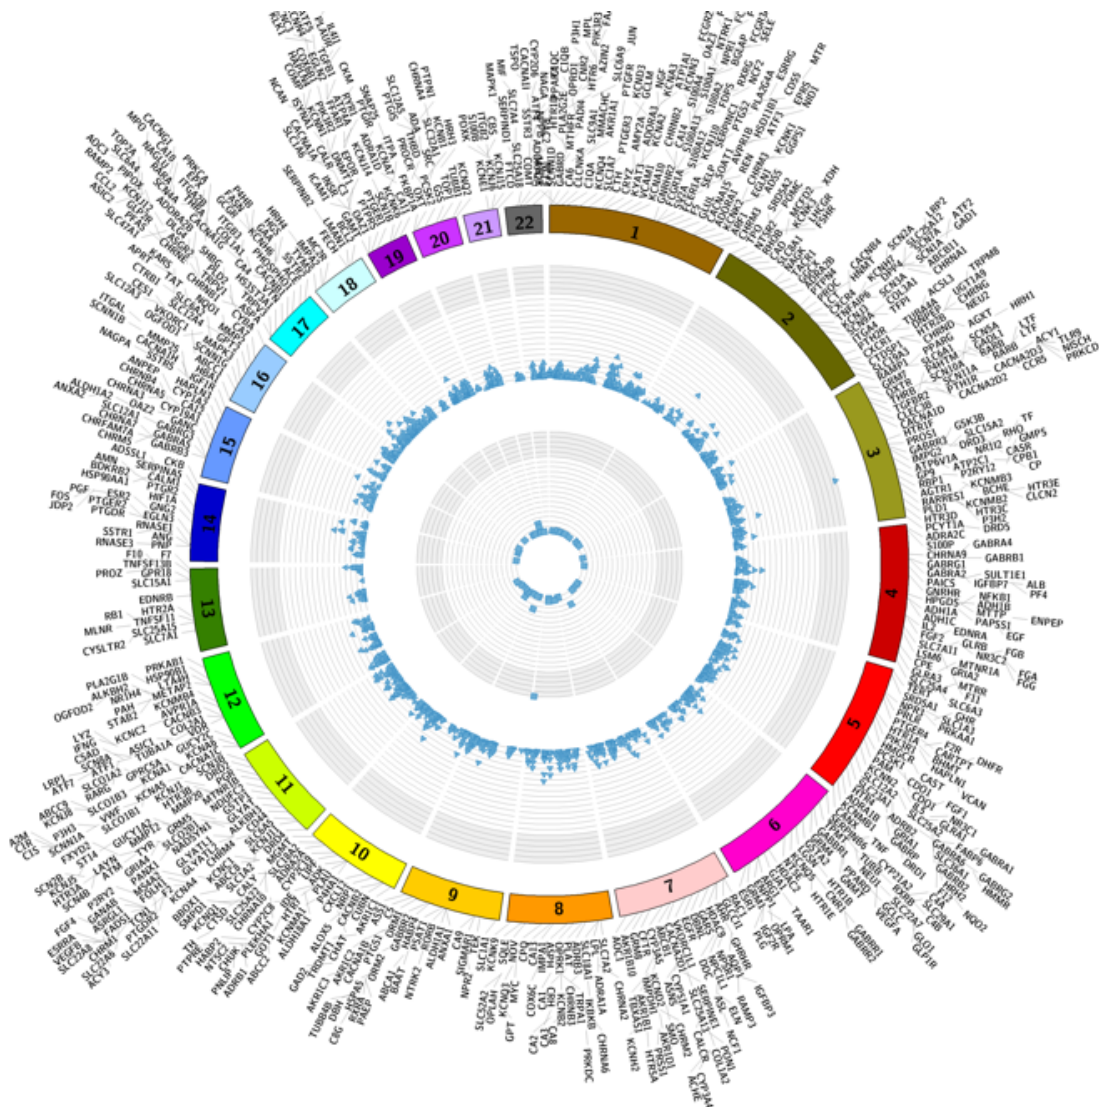

Supplementary Figure 2: Circos plot for Functional filter 3 category

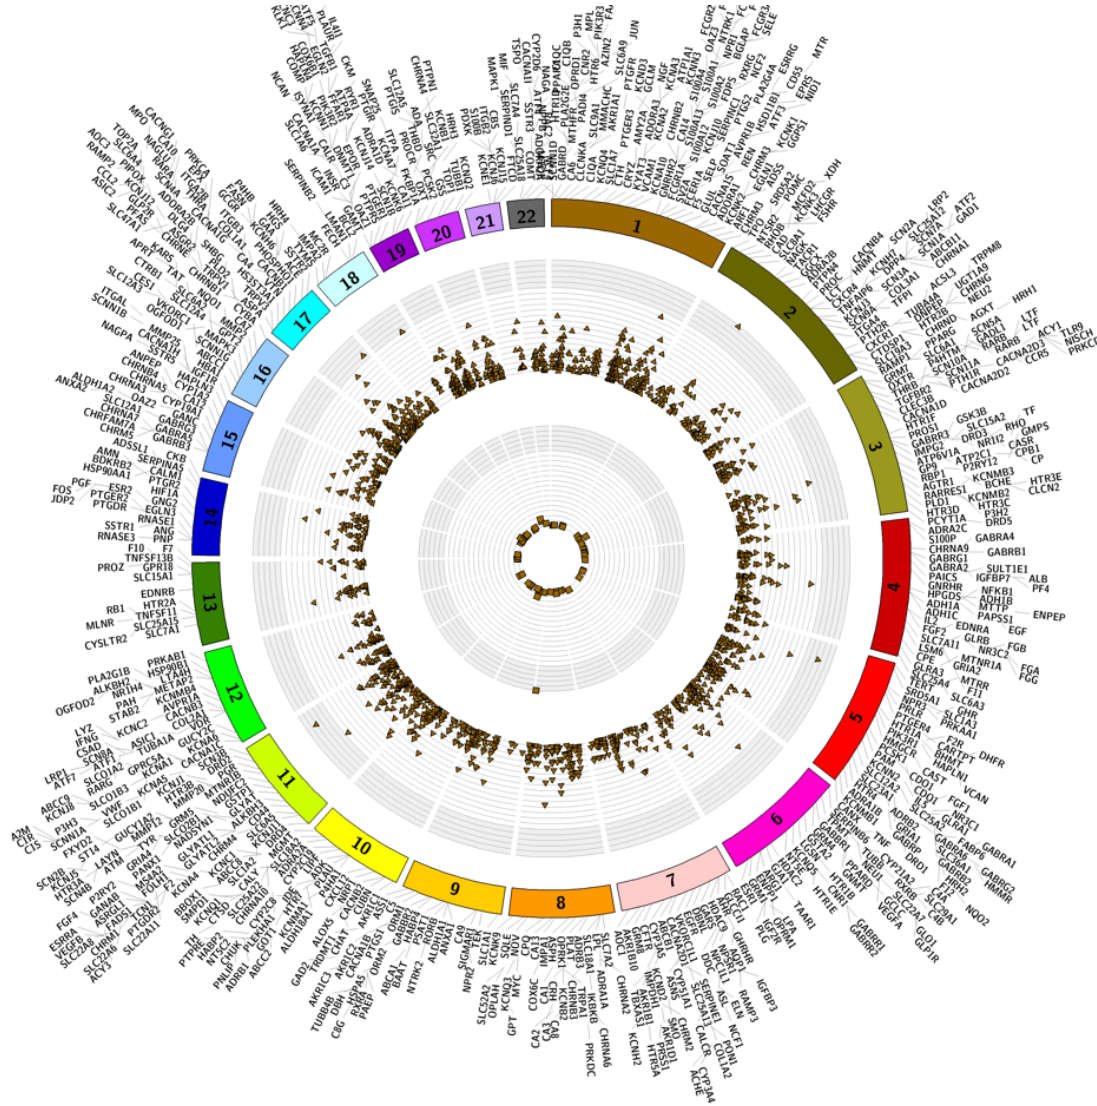

Supplementary Figure 3: Circos plot for All variants category

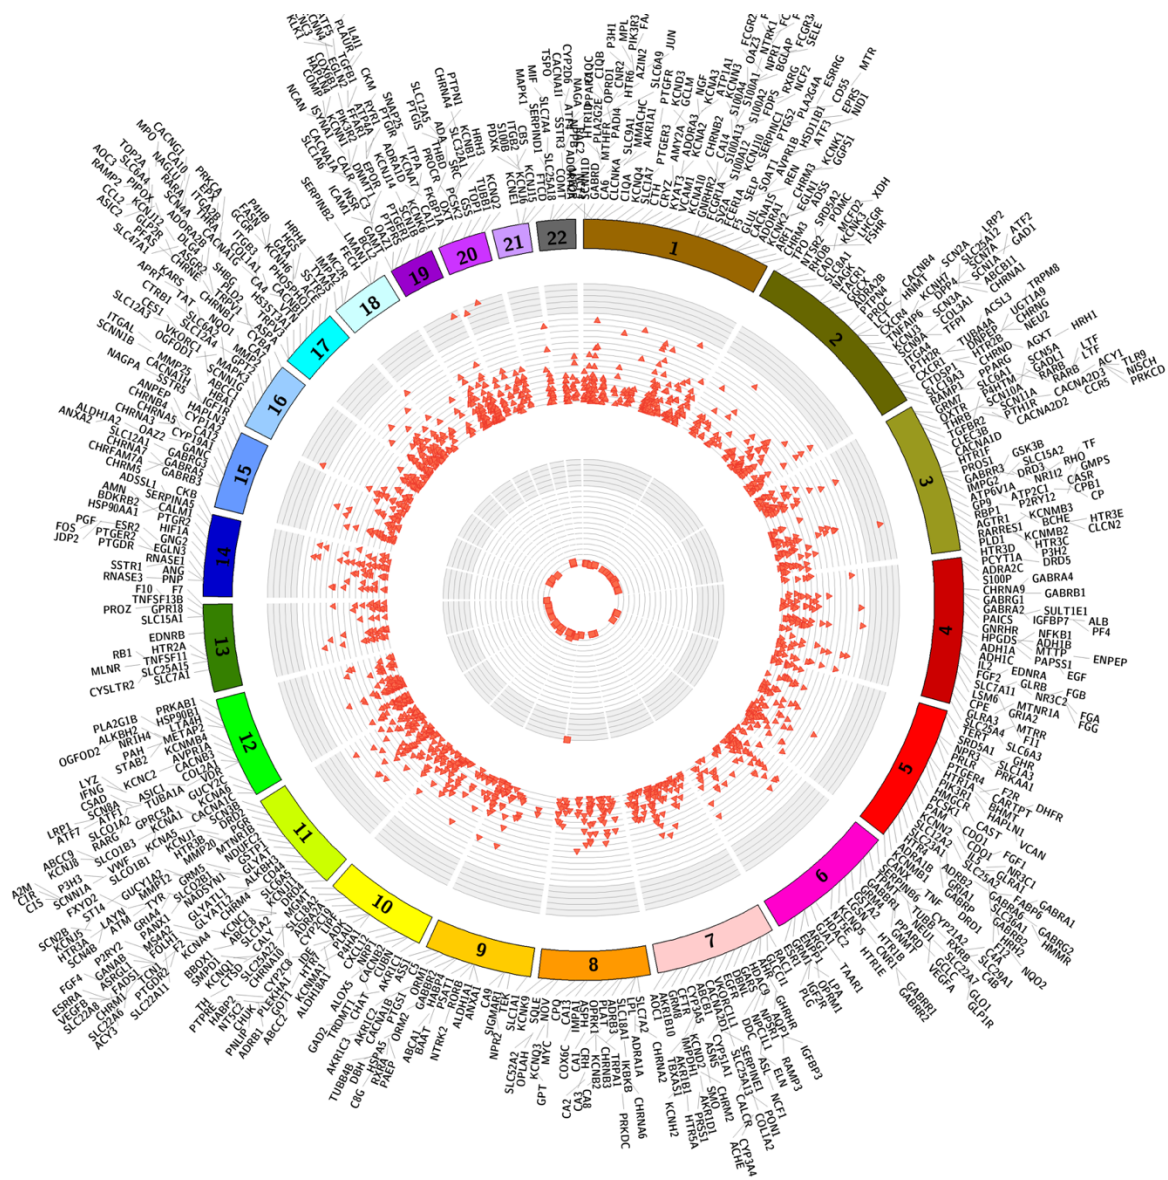



Supplementary Figure 4: Circos plot for Non-functional Filter category

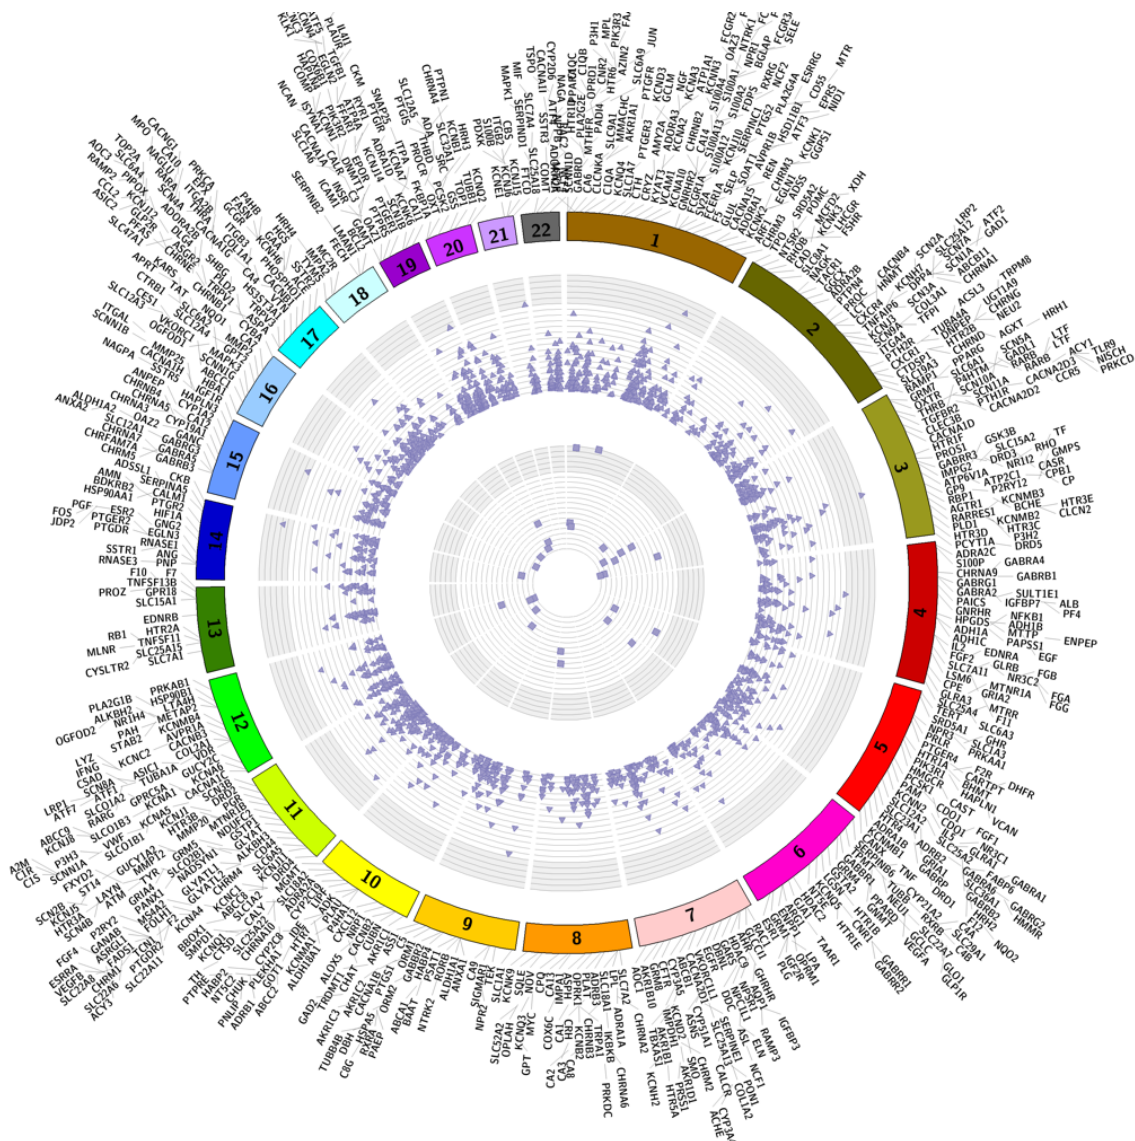

**Supplementary Figure 5: Phenogram plot representing cross-phenotype associations from results with P-values < 1e-08. Shapes correspond to ICD-9 code description or Laboratory measurements for both results that are Bonferroni significant and P-value < 1e-04 significant**

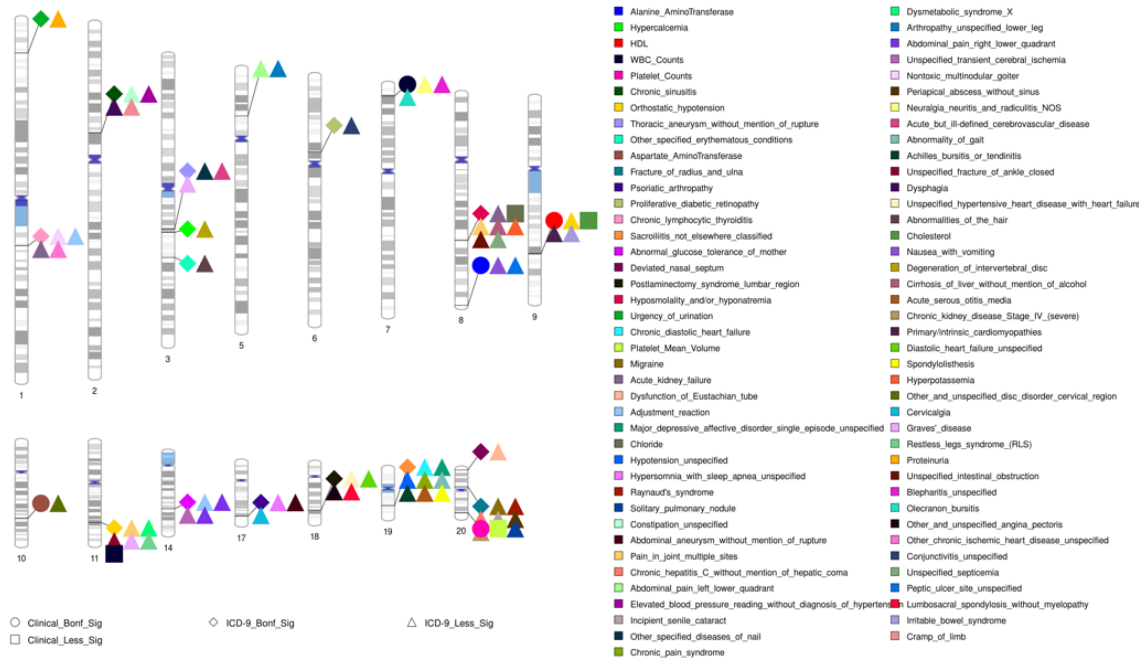



Supplementary Figure 6: Count of results below FDR q-value 0.25 from GSEA for ICD-9 codes

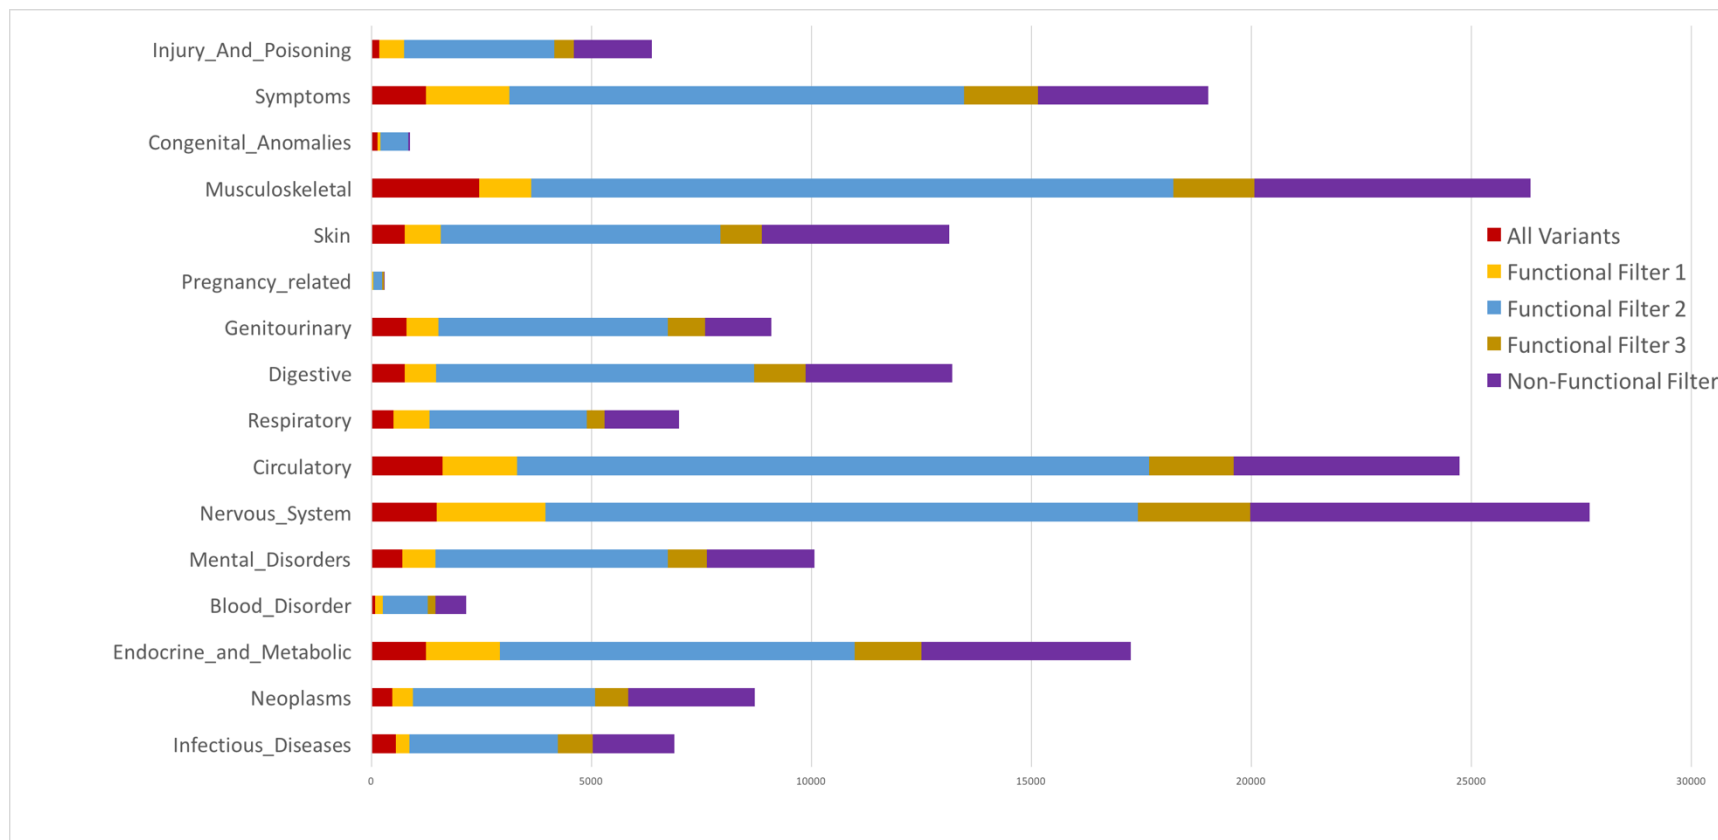

**Supplementary Figure 7: Count of results below FDR q-value 0,25 from GSEA for Clinical laboratory measurements**

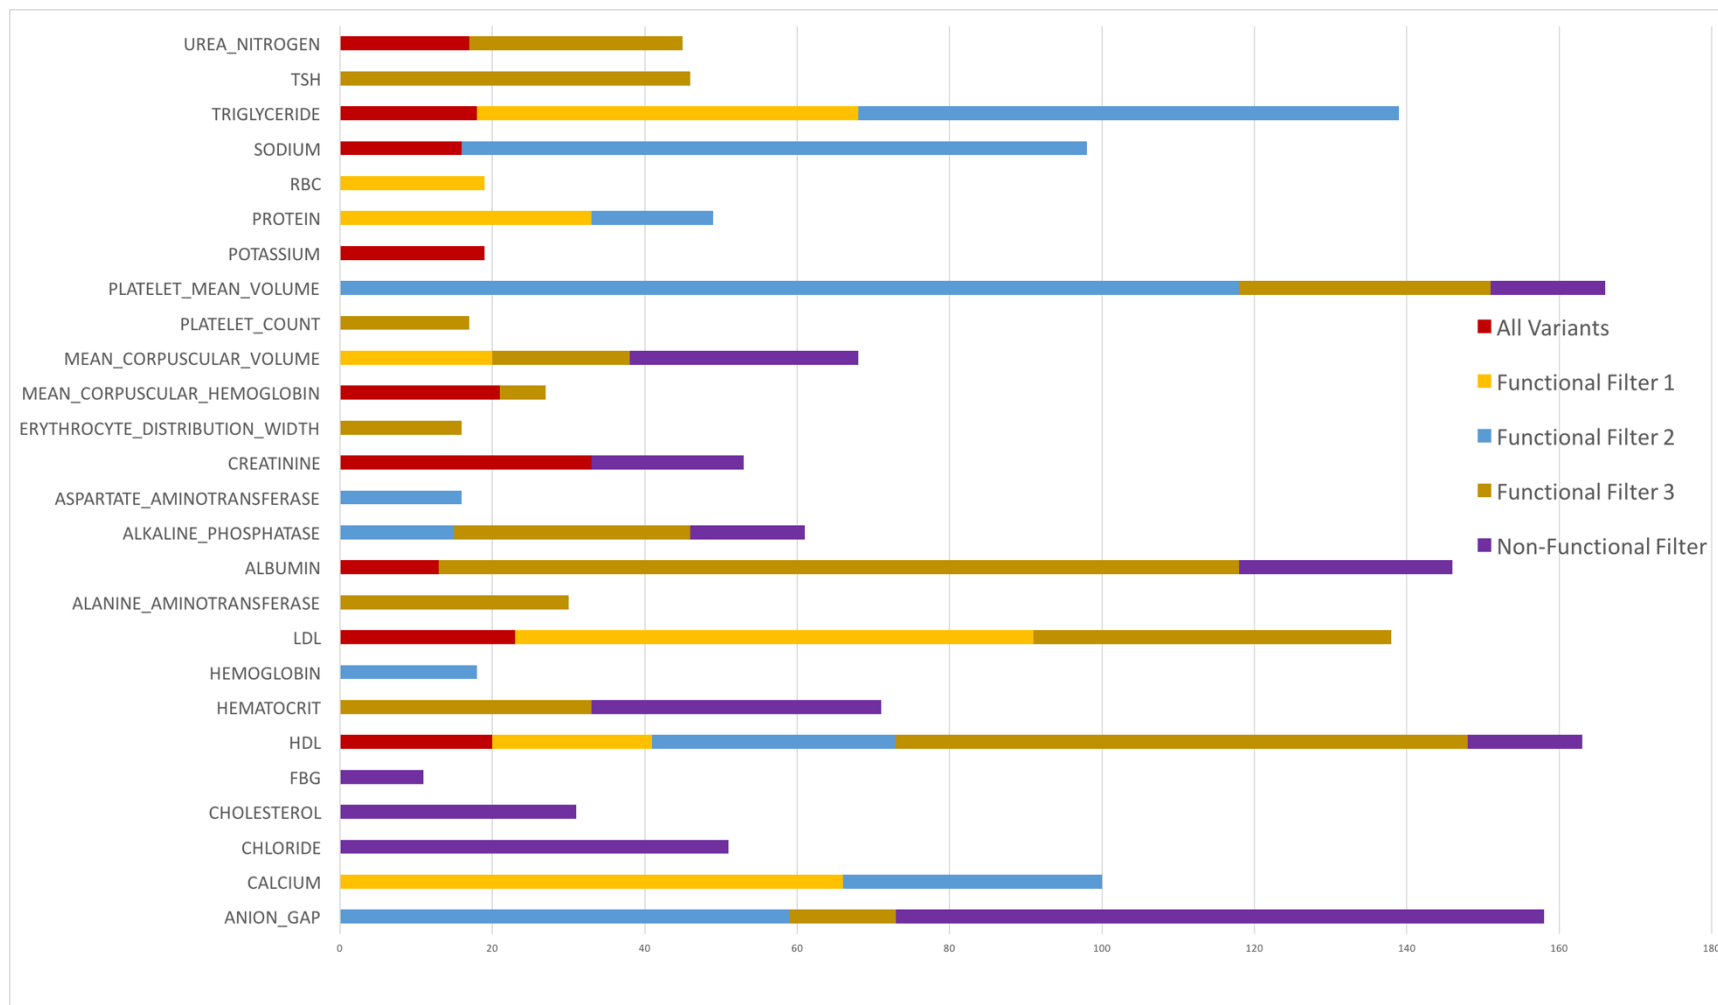

**Supplementary Figure 8: Heat map of GSEA results where FDR q-value=0. These results are separated by LOF filter category. X-axis is the gene name and Y-axis represent combination on Phenotype (on right) and Gene-set (On left). Gradient of color corresponds to the normalized enrichment score (NES).**

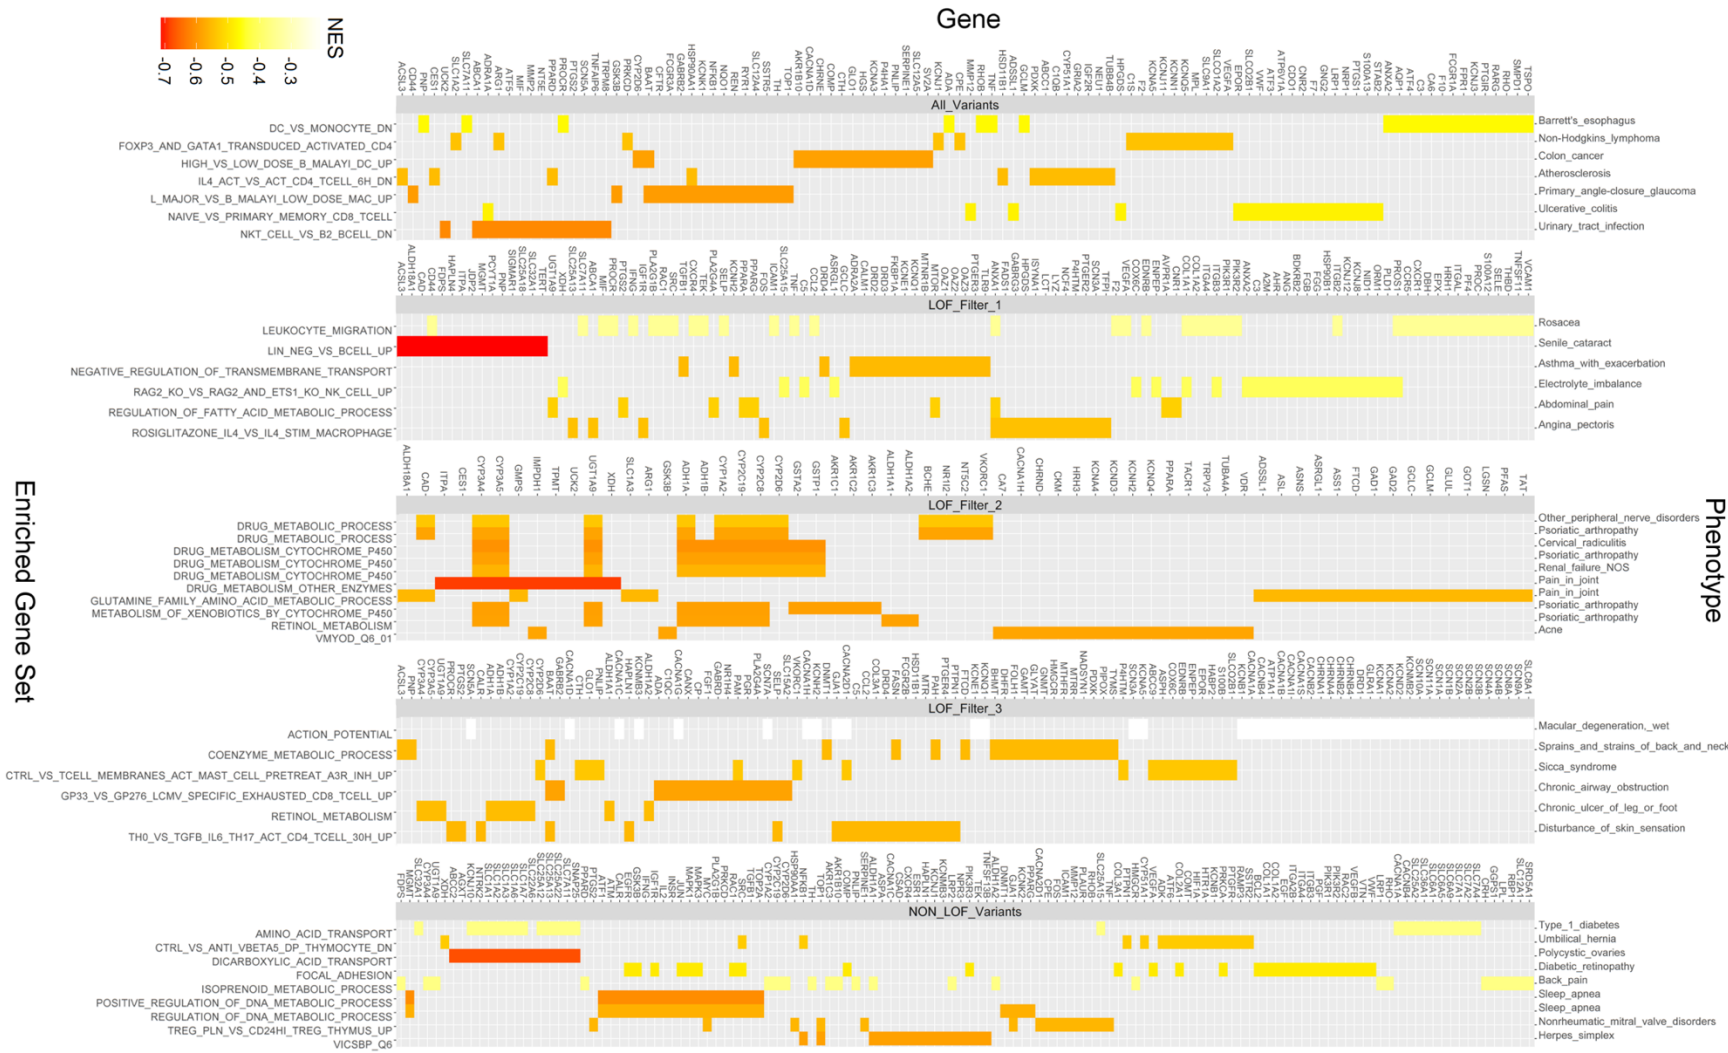

**Supplementary Figure 9: The top 3 enriched gene sets along with the genes that are found to be enriched in these pathways. The size of the points corresponds to the normalized enrichment score, and the color corresponds to the Filter type from the tests. X-axis labels are gene names and y-axis labels are clinical lab measures or ICD-9 phenotype categories)**

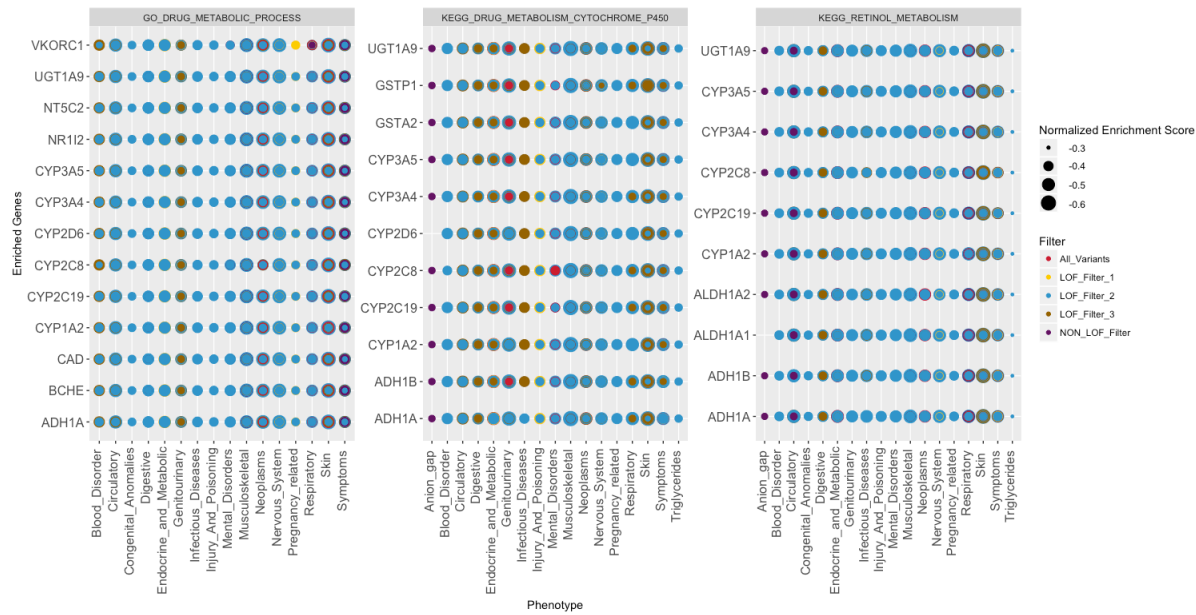



**Supplementary Table 1: Bonferroni Significant Results**

| Phenotype                   | Category                        | Gene          | Num   |            | Case        |      | Case |          | Analysis | Beta     | Pval  | SE       | Novel<br>or<br>Known |                     |
|-----------------------------|---------------------------------|---------------|-------|------------|-------------|------|------|----------|----------|----------|-------|----------|----------------------|---------------------|
|                             |                                 |               | Cases | Num<br>ols | Num<br>Vars | Vars | Vars | Capacity |          |          |       |          |                      | Control<br>Capacity |
| Platelet Counts             | Platelet<br>Counts              | <i>TUBB1</i>  | 0     | 35786      | 844         | 0    | 844  | 0        | 5648666  | Filter 2 | -34.1 | 7.85E-11 | 5.24                 | Known               |
| Alanine<br>AminoTransferase | Alanine<br>AminoTrans<br>ferase | <i>GPT</i>    | 0     | 34350      | 910         | 0    | 910  | 0        | 8808146  | Filter 3 | -0.72 | 3.29E-83 | 0.03                 | Known               |
| Alanine<br>AminoTransferase | Alanine<br>AminoTrans<br>ferase | <i>GPT</i>    | 0     | 34350      | 348         | 0    | 348  | 0        | 5343252  | Filter 2 | -0.84 | 3.29E-83 | 0.04                 | Known               |
| Alanine<br>AminoTransferase | Alanine<br>AminoTrans<br>ferase | <i>GPT</i>    | 0     | 34350      | 1697        | 0    | 1697 | 0        | 15643938 | AllVar   | -0.43 | 2.80E-78 | 0.02                 | Known               |
| Bilirubin                   | Bilirubin                       | <i>UGT1A1</i> | 0     | 33769      | 502         | 0    | 502  | 0        | 7833072  | Filter 1 | 0.29  | 4.61E-17 | 0.03                 | Known               |
| Bilirubin                   | Bilirubin                       | <i>UGT1A1</i> | 0     | 33769      | 378         | 0    | 378  | 0        | 7022704  | Filter 3 | 0.3   | 1.42E-16 | 0.04                 | Known               |
| HDL                         | HDL                             | <i>ABCA1</i>  | 0     | 29665      | 587         | 0    | 587  | 0        | 7528332  | Filter 2 | -0.18 | 3.81E-15 | 0.02                 | Known               |
| Bilirubin                   | Bilirubin                       | <i>UGT1A3</i> | 0     | 33769      | 860         | 0    | 860  | 0        | 9048832  | Filter 3 | 0.24  | 5.85E-15 | 0.03                 | Known               |
| Bilirubin                   | Bilirubin                       | <i>UGT1A3</i> | 0     | 33769      | 1142        | 0    | 1142 | 0        | 11547646 | Filter 1 | 0.2   | 9.54E-14 | 0.03                 | Known               |
| Bilirubin                   | Bilirubin                       | <i>UGT1A5</i> | 0     | 33769      | 1843        | 0    | 1843 | 0        | 13100988 | Filter 3 | 0.19  | 1.99E-13 | 0.03                 | Known               |
| Bilirubin                   | Bilirubin                       | <i>UGT1A4</i> | 0     | 33769      | 1313        | 0    | 1313 | 0        | 11345066 | Filter 3 | 0.19  | 2.02E-12 | 0.03                 | Known               |
| Bilirubin                   | Bilirubin                       | <i>UGT1A6</i> | 0     | 33769      | 1972        | 0    | 1972 | 0        | 15734846 | Filter 3 | 0.16  | 5.71E-12 | 0.02                 | Known               |

|                                               |                               |                |     |       |      |    |      |       |          |          |       |          |      |       |
|-----------------------------------------------|-------------------------------|----------------|-----|-------|------|----|------|-------|----------|----------|-------|----------|------|-------|
| Bilirubin                                     | Bilirubin                     | <i>UGT1A7</i>  | 0   | 33769 | 2284 | 0  | 2284 | 0     | 17558210 | Filter 3 | 0.15  | 2.00E-11 | 0.02 | Known |
| Bilirubin                                     | Bilirubin                     | <i>UGT1A5</i>  | 0   | 33769 | 2663 | 0  | 2663 | 0     | 18233706 | Filter 1 | 0.13  | 1.37E-10 | 0.02 | Known |
| Bilirubin                                     | Bilirubin                     | <i>UGT1A6</i>  | 0   | 33769 | 2871 | 0  | 2871 | 0     | 21745420 | Filter 1 | 0.12  | 1.60E-10 | 0.02 | Known |
| Bilirubin                                     | Bilirubin                     | <i>UGT1A10</i> | 0   | 33769 | 2539 | 0  | 2539 | 0     | 19584322 | Filter 3 | 0.13  | 8.15E-10 | 0.02 | Known |
| Bilirubin                                     | Bilirubin                     | <i>UGT1A</i>   | 0   | 33769 | 2539 | 0  | 2539 | 0     | 19584322 | Filter 3 | 0.13  | 8.15E-10 | 0.02 | Known |
| Bilirubin                                     | Bilirubin                     | <i>UGT1A8</i>  | 0   | 33769 | 2539 | 0  | 2539 | 0     | 19584322 | Filter 3 | 0.13  | 8.15E-10 | 0.02 | Known |
| Bilirubin                                     | Bilirubin                     | <i>UGT1A9</i>  | 0   | 33769 | 2539 | 0  | 2539 | 0     | 19584322 | Filter 3 | 0.13  | 8.15E-10 | 0.02 | Known |
| HDL                                           | HDL                           | <i>ABCA1</i>   | 0   | 29665 | 1995 | 0  | 1995 | 0     | 19327520 | Filter 3 | -0.08 | 9.59E-10 | 0.01 | Known |
| Hypercalcemia                                 | Metabolic                     | <i>CASR</i>    | 252 | 37742 | 94   | 11 | 83   | 22136 | 3313030  | Filter 2 | 3.89  | 1.34E-22 | 0.40 | Known |
| Alcohol abuse,<br>unspecified                 | Mental<br>Disorders           | <i>ADRA2B</i>  | 149 | 37775 | 78   | 4  | 74   | 2948  | 748612   | Filter 2 | 4.59  | 3.88E-10 | 0.73 | Known |
| Other specified<br>erythematous<br>conditions | Skin                          | <i>RBP1</i>    | 184 | 37318 | 207  | 7  | 200  | 14286 | 2898302  | Filter 1 | 3.26  | 1.28E-09 | 0.54 | Known |
| Other specified<br>erythematous<br>conditions | Skin                          | <i>RBP1</i>    | 184 | 37318 | 235  | 7  | 228  | 17176 | 3484988  | AllVar   | 3.05  | 9.82E-09 | 0.53 | Known |
| Hypercalcemia                                 | Metabolic<br>Endocrine<br>and | <i>CASR</i>    | 252 | 37742 | 337  | 12 | 325  | 52322 | 7833962  | Filter 3 | 2.34  | 1.32E-08 | 0.41 | Known |
| Hypercalcemia                                 | Metabolic                     | <i>CASR</i>    | 252 | 37742 | 633  | 17 | 616  | 61392 | 9192314  | Filter 1 | 2.19  | 1.74E-08 | 0.39 | Known |

|                                               |                  |                 |     |       |     |    |     |       |         |          |       |          |      |       |
|-----------------------------------------------|------------------|-----------------|-----|-------|-----|----|-----|-------|---------|----------|-------|----------|------|-------|
| Tachycardia, unspecified                      | Symptoms         | <i>KCNJ12</i>   | 226 | 36588 | 429 | 6  | 423 | 12158 | 1965614 | Filter 2 | 3.37  | 2.98E-08 | 0.61 | Known |
| Vitreous hemorrhage                           | Nervous System   | <i>PF4</i>      | 210 | 38174 | 46  | 3  | 43  | 2520  | 458052  | VarOnly  | 5.53  | 3.54E-08 | 1.00 | Known |
| Lesion of ulnar nerve                         | Nervous System   | <i>CACNB1</i>   | 188 | 37821 | 909 | 9  | 900 | 31878 | 6413544 | Filter 1 | 2.63  | 5.61E-08 | 0.49 | Known |
| Chronic pain syndrome                         | Nervous System   | <i>SERPINA5</i> | 217 | 37906 | 111 | 4  | 107 | 9970  | 1740536 | Filter 2 | 3.51  | 5.80E-08 | 0.65 | Known |
| Unspecified disorder of kidney and ureter     | Genitourinary    | <i>AKR1C3</i>   | 339 | 36914 | 343 | 10 | 333 | 18960 | 2064600 | Filter 2 | 3.17  | 7.56E-08 | 0.59 | Known |
| Postinflammatory pulmonary fibrosis           | Respiratory      | <i>AGTR1</i>    | 193 | 38077 | 531 | 8  | 523 | 20138 | 3943358 | Filter 3 | 2.94  | 1.03E-07 | 0.55 | Known |
| Ptosis of eyelid, unspecified                 | Nervous System   | <i>S100B</i>    | 253 | 37877 | 39  | 3  | 36  | 9108  | 1363556 | Filter 1 | 3.66  | 1.04E-07 | 0.69 | Known |
| Attention deficit disorder with hyperactivity | Mental Disorders | <i>VEGFA</i>    | 178 | 38209 | 69  | 6  | 63  | 9098  | 1959638 | Filter 2 | 2.7   | 1.08E-07 | 0.51 | Known |
| WBC Counts                                    | WBC Counts       | <i>GLCCI1</i>   | 0   | 36587 | 82  | 0  | 82  | 0     | 2122688 | Filter 2 | -0.33 | 2.33E-13 | 0.04 | Novel |
| Unspecified sinusitis (chronic)               | Respiratory      | <i>TACR1</i>    | 578 | 35475 | 267 | 15 | 252 | 77318 | 4746300 | Filter 3 | 2.35  | 2.02E-10 | 0.37 | Novel |
| Orthostatic hypotension                       | Circulatory      | <i>GUCY1A2</i>  | 186 | 37300 | 437 | 9  | 428 | 29498 | 5921056 | Filter 3 | 2.81  | 7.79E-10 | 0.46 | Novel |
| Unspecified sinusitis (chronic)               | Respiratory      | <i>TACR1</i>    | 578 | 35475 | 275 | 15 | 260 | 83098 | 5100974 | Filter 1 | 2.26  | 7.98E-10 | 0.37 | Novel |

|                                                        |                         |               |           |      |    |            |          |          |      |          |      |       |
|--------------------------------------------------------|-------------------------|---------------|-----------|------|----|------------|----------|----------|------|----------|------|-------|
| Thoracic aneurysm without mention of rupture           | Circulatory             | <i>GSK3B</i>  | 223 38131 | 228  | 7  | 221 11596  | 1981910  | VarOnly  | 3.89 | 1.08E-09 | 0.64 | Novel |
| Adjustment disorder with anxiety                       | Mental Disorders        | <i>NPR3</i>   | 206 37764 | 718  | 10 | 708 39226  | 7194718  | Filter 3 | 2.45 | 1.21E-09 | 0.40 | Novel |
| Other closed fractures of distal end of radius (alone) | Injury And Poisoning    | <i>THBD</i>   | 183 38128 | 1269 | 13 | 1256 57000 | 11972710 | AllVar   | 2.11 | 3.54E-09 | 0.36 | Novel |
| Psoriatic arthropathy                                  | Skin                    | <i>SSTR2</i>  | 172 38308 | 121  | 5  | 116 18904  | 4210310  | Filter 3 | 2.91 | 3.78E-09 | 0.49 | Novel |
| Proliferative diabetic retinopathy                     | Nervous System          | <i>GSTA2</i>  | 243 38194 | 571  | 7  | 564 14580  | 2291582  | Filter 1 | 3.54 | 3.81E-09 | 0.60 | Novel |
| Chronic lymphocytic thyroiditis                        | Endocrine and Metabolic | <i>BGLAP</i>  | 222 38080 | 23   | 2  | 21 3988    | 681930   | Filter 2 | 5.22 | 5.02E-09 | 0.89 | Novel |
| Sacroiliitis, not elsewhere classified                 | Musculoskeletal         | <i>KCNJ14</i> | 708 36820 | 1763 | 45 | 1718 2E+05 | 9621778  | AllVar   | 1.63 | 5.13E-09 | 0.28 | Novel |
| Malignant neoplasm of upper lobe, bronchus or lung     | Neoplasms               | <i>REN</i>    | 144 38318 | 214  | 4  | 210 8912   | 2373662  | VarOnly  | 3.63 | 5.17E-09 | 0.62 | Novel |

|                                                                            |                         |                 |           |     |    |           |         |          |      |          |      |       |
|----------------------------------------------------------------------------|-------------------------|-----------------|-----------|-----|----|-----------|---------|----------|------|----------|------|-------|
| Abnormal glucose tolerance of mother, antepartum condition or complication | Pregnancy related       | <i>PTGR2</i>    | 207 38106 | 141 | 5  | 136 11158 | 2054380 | Filter 2 | 4.02 | 5.49E-09 | 0.69 | Novel |
| Deviated nasal septum                                                      | Respiratory             | <i>FKBP1A</i>   | 227 37572 | 22  | 3  | 19 4432   | 738012  | AllVar   | 4.27 | 6.79E-09 | 0.74 | Novel |
| Orthostatic hypotension                                                    | Circulatory             | <i>GUCY1A2</i>  | 186 37300 | 553 | 10 | 543 36792 | 7386224 | Filter 1 | 2.54 | 7.11E-09 | 0.44 | Novel |
| Postlaminectomy syndrome, lumbar region                                    | Musculoskeletal         | <i>SERPINB2</i> | 578 37622 | 755 | 23 | 732 97076 | 6317542 | Filter 3 | 1.97 | 8.02E-09 | 0.34 | Novel |
| Hyposmolality and/or hyponatremia                                          | Endocrine and Metabolic | <i>COX6C</i>    | 239 36793 | 10  | 3  | 7 2384    | 367652  | Filter 2 | 6.37 | 8.28E-09 | 1.10 | Novel |
| Nonspecific abnormal results of function study of liver                    | Symptoms                | <i>BDKRB2</i>   | 591 36386 | 253 | 17 | 236 46478 | 2856568 | VarOnly  | 2.44 | 8.90E-09 | 0.42 | Novel |
| Urgency of urination                                                       | Symptoms                | <i>HTR1D</i>    | 178 37035 | 420 | 10 | 410 29138 | 6060614 | Filter 1 | 2.73 | 9.65E-09 | 0.48 | Novel |
| Panniculitis, unspecified site                                             | Musculoskeletal         | <i>ARVCF</i>    | 308 38015 | 238 | 8  | 230 28788 | 3552416 | AllVar   | 2.92 | 1.02E-08 | 0.51 | Novel |
| Psoriatic arthropathy                                                      | Skin                    | <i>SSTR2</i>    | 172 38308 | 136 | 5  | 131 21648 | 4820996 | Filter 1 | 2.77 | 1.12E-08 | 0.49 | Novel |



|                                                |                      |                |           |      |    |            |          |          |      |          |      |       |
|------------------------------------------------|----------------------|----------------|-----------|------|----|------------|----------|----------|------|----------|------|-------|
| Temporomandibular joint disorders, unspecified | Digestive            | <i>PTGDR2</i>  | 218 37188 | 260  | 8  | 252 24316  | 4159712  | Filter 3 | 2.84 | 1.36E-08 | 0.50 | Novel |
| Other                                          |                      |                |           |      |    |            |          |          |      |          |      |       |
| tenosynovitis of hand and wrist                | Musculoskeletal      | <i>CACNA1H</i> | 164 36967 | 7377 | 47 | 7330 3E+05 | 58268070 | Filter 1 | 1.35 | 1.50E-08 | 0.24 | Novel |
| Sinoatrial node dysfunction                    | Circulatory          | <i>LIPF</i>    | 268 38020 | 150  | 3  | 147 8558   | 1214432  | Filter 2 | 3.96 | 1.56E-08 | 0.70 | Novel |
| Other syndromes affecting cervical region      | Musculoskeletal      | <i>HTR3B</i>   | 149 38163 | 1152 | 12 | 1140 29198 | 7477184  | Filter 1 | 2.27 | 1.77E-08 | 0.40 | Novel |
| Lesion of ulnar nerve                          | Nervous System       | <i>CACNB1</i>  | 188 37821 | 718  | 9  | 709 30000  | 6035500  | Filter 3 | 2.71 | 1.79E-08 | 0.48 | Novel |
| Ostium secundum type atrial septal defect      | Congenital Anomalies | <i>HSD11B1</i> | 164 38148 | 80   | 3  | 77 7216    | 1678092  | Filter 3 | 3.69 | 1.89E-08 | 0.66 | Novel |
| Proliferative diabetic retinopathy             | Nervous System       | <i>GSTA2</i>   | 243 38194 | 550  | 6  | 544 11178  | 1756900  | Filter 3 | 3.7  | 1.92E-08 | 0.66 | Novel |
| Sinoatrial node dysfunction                    | Circulatory          | <i>CHRN4</i>   | 268 38020 | 637  | 16 | 621 20020  | 2824836  | VarOnly  | 3.3  | 2.26E-08 | 0.59 | Novel |
| Postinflammatory pulmonary fibrosis            | Respiratory          | <i>AGTR1</i>   | 193 38077 | 344  | 6  | 338 9922   | 1939538  | Filter 2 | 3.45 | 2.28E-08 | 0.62 | Novel |

|                                                       |                      |                |     |       |       |    |       |       |          |          |      |          |      |       |
|-------------------------------------------------------|----------------------|----------------|-----|-------|-------|----|-------|-------|----------|----------|------|----------|------|-------|
| Degeneration of intervertebral disc, site unspecified | Musculoskeletal      | <i>SCN7A</i>   | 178 | 38006 | 612   | 11 | 601   | 30914 | 6594694  | Filter 2 | 2.56 | 2.45E-08 | 0.46 | Novel |
| Bipolar disorder, unspecified                         | Mental Disorders     | <i>PDXK</i>    | 427 | 37727 | 226   | 7  | 219   | 31392 | 2772698  | VarOnly  | 2.82 | 2.47E-08 | 0.51 | Novel |
| Varicose veins of lower extremities with ulcer        | Circulatory          | <i>TYMS</i>    | 159 | 38153 | 741   | 11 | 730   | 19148 | 4603708  | Filter 1 | 2.79 | 2.49E-08 | 0.50 | Novel |
| Chronic diastolic heart failure                       | Circulatory          | <i>KCNJ14</i>  | 270 | 37673 | 884   | 16 | 868   | 18518 | 2592428  | VarOnly  | 3.22 | 2.62E-08 | 0.58 | Novel |
| Other tenosynovitis of hand and wrist                 | Musculoskeletal      | <i>CACNA1H</i> | 164 | 36967 | 12883 | 76 | 12807 | 4E+05 | 91080326 | AllVar   | 1.15 | 3.69E-08 | 0.21 | Novel |
| Endothelial corneal dystrophy                         | Nervous System       | <i>NFKB1</i>   | 155 | 38251 | 323   | 7  | 316   | 30334 | 7491708  | Filter 3 | 2.71 | 3.73E-08 | 0.49 | Novel |
| Closed fracture of metatarsal bone(s)                 | Injury And Poisoning | <i>NPR2</i>    | 147 | 38119 | 322   | 8  | 314   | 18736 | 4858588  | VarOnly  | 2.99 | 4.24E-08 | 0.55 | Novel |
| Bunion                                                | Musculoskeletal      | <i>DBH-AS1</i> | 155 | 37559 | 301   | 4  | 297   | 3948  | 954562   | Filter 2 | 4.52 | 4.46E-08 | 0.83 | Novel |

|                                                                 |                  |                |           |     |    |           |         |          |      |          |      |       |
|-----------------------------------------------------------------|------------------|----------------|-----------|-----|----|-----------|---------|----------|------|----------|------|-------|
| Cerebral artery occlusion, unspecified with cerebral infarction | Circulatory      | <i>GNRHR</i>   | 325 37467 | 511 | 11 | 500 8878  | 1022112 | Filter 2 | 3.76 | 4.85E-08 | 0.69 | Novel |
| Chronic obstructive asthma, unspecified                         | Respiratory      | <i>PTGS2</i>   | 183 37841 | 164 | 5  | 159 15720 | 3253268 | VarOnly  | 3.1  | 4.91E-08 | 0.57 | Novel |
| Alcohol abuse, unspecified                                      | Mental Disorders | <i>DNMT1</i>   | 149 37775 | 113 | 4  | 109 12206 | 3092700 | Filter 2 | 3.1  | 5.88E-08 | 0.57 | Novel |
| Unspecified pleural effusion                                    | Respiratory      | <i>GHR</i>     | 294 37163 | 932 | 17 | 915 52316 | 6613700 | Filter 3 | 2.23 | 6.01E-08 | 0.41 | Novel |
| Acute maxillary sinusitis                                       | Respiratory      | <i>TFPI</i>    | 159 37059 | 11  | 2  | 9 2844    | 662252  | Filter 2 | 4.4  | 6.44E-08 | 0.81 | Novel |
| Sensorineural hearing loss, unspecified                         | Nervous System   | <i>FOS</i>     | 899 35965 | 467 | 21 | 446 36530 | 1464190 | Filter 2 | 3.03 | 6.73E-08 | 0.56 | Novel |
| Degeneration of intervertebral disc, site unspecified           | Musculoskeletal  | <i>KCNJ11</i>  | 178 38006 | 470 | 8  | 462 21966 | 4699252 | VarOnly  | 2.68 | 7.09E-08 | 0.50 | Novel |
| Dehydration                                                     | Metabolic        | <i>SLC22A6</i> | 162 36308 | 650 | 7  | 643 39032 | 8742788 | Filter 1 | 2.53 | 7.24E-08 | 0.47 | Novel |
| Deviated nasal septum                                           | Respiratory      | <i>ANPEP</i>   | 227 37572 | 365 | 8  | 357 26864 | 4445828 | Filter 2 | 2.77 | 7.79E-08 | 0.52 | Novel |

|                                                                    |                  |                                |      |       |      |    |      |       |         |          |      |          |      |       |
|--------------------------------------------------------------------|------------------|--------------------------------|------|-------|------|----|------|-------|---------|----------|------|----------|------|-------|
| Solitary pulmonary nodule                                          | Symptoms         | <i>CACNA2D</i><br><i>3-AS1</i> | 201  | 37675 | 31   | 3  | 28   | 5224  | 979330  | VarOnly  | 3.91 | 7.93E-08 | 0.73 | Novel |
| Ocular hypertension                                                | Nervous System   | <i>ADH1C</i>                   | 446  | 37452 | 1453 | 25 | 1428 | 46384 | 3894932 | VarOnly  | 2.49 | 7.98E-08 | 0.46 | Novel |
| Cellulitis and abscess of foot, except toes                        | Skin             | <i>ACSL3</i>                   | 209  | 37324 | 1192 | 19 | 1173 | 20026 | 3576910 | VarOnly  | 2.99 | 8.23E-08 | 0.56 | Novel |
| Osteoarthritis, generalized, site unspecified                      | Musculoskeletal  | <i>RARA</i>                    | 2813 | 32960 | 350  | 47 | 303  | 5E+05 | 5508298 | Filter 3 | 1.5  | 8.69E-08 | 0.28 | Novel |
| Unspecified episodic mood disorder                                 | Mental Disorders | <i>SELP</i>                    | 235  | 37548 | 239  | 6  | 233  | 25844 | 4129570 | Filter 2 | 2.78 | 9.80E-08 | 0.52 | Novel |
| Difficulty in walking                                              | Musculoskeletal  | <i>CA3</i>                     | 196  | 37992 | 62   | 4  | 58   | 10174 | 1972856 | Filter 2 | 3.54 | 9.98E-08 | 0.67 | Novel |
| Atherosclerosis of native arteries of the extremities, unspecified | Circulatory      | <i>GABBR2</i>                  | 305  | 37502 | 38   | 4  | 34   | 13022 | 1608186 | Filter 2 | 3.31 | 1.03E-07 | 0.62 | Novel |
| Pain in thoracic spine                                             | Musculoskeletal  | <i>NPPB</i>                    | 148  | 37332 | 701  | 9  | 692  | 2068  | 522400  | VarOnly  | 5.13 | 1.04E-07 | 0.96 | Novel |

Migraine,  
unspecified,  
without  
mention of  
intractable  
migraine  
without  
mention of  
status  
migrainosus  
Adjustment  
disorder with  
anxiety

|                  |              |      |       |     |    |     |       |         |          |      |          |      |       |
|------------------|--------------|------|-------|-----|----|-----|-------|---------|----------|------|----------|------|-------|
| Nervous System   | <i>NR1/2</i> | 1395 | 35151 | 961 | 56 | 905 | 1E+05 | 2948762 | VarOnly  | 2.09 | 1.04E-07 | 0.39 | Novel |
| Mental Disorders | <i>NPR3</i>  | 206  | 37764 | 820 | 10 | 810 | 52404 | 9610368 | Filter 1 | 2.15 | 1.08E-07 | 0.41 | Novel |



**Supplementary Table 2: Genes and their positions**

| <b>Gene</b>    | <b>Chr</b> | <b>startpos</b> | <b>endpos</b> |
|----------------|------------|-----------------|---------------|
| <i>A2M</i>     | 12         | 9220304         | 9268558       |
| <i>ABCA1</i>   | 9          | 107543283       | 107690527     |
| <i>ABCB1</i>   | 7          | 87133179        | 87342639      |
| <i>ABCB11</i>  | 2          | 169779312       | 169891400     |
| <i>ABCC1</i>   | 16         | 16043434        | 16236931      |
| <i>ABCC2</i>   | 10         | 101542355       | 101612333     |
| <i>ABCC8</i>   | 11         | 17414432        | 17498392      |
| <i>ABCC9</i>   | 12         | 21950323        | 22094797      |
| <i>ACE</i>     | 17         | 61554422        | 61575741      |
| <i>ACHE</i>    | 7          | 100487615       | 100494306     |
| <i>ACSL3</i>   | 2          | 223725702       | 223808119     |
| <i>ACY1</i>    | 3          | 52017300        | 52023218      |
| <i>ACY3</i>    | 11         | 67410026        | 67418278      |
| <i>ADA</i>     | 20         | 43248163        | 43280874      |
| <i>ADH1A</i>   | 4          | 100197523       | 100212185     |
| <i>ADH1B</i>   | 4          | 100227544       | 100242599     |
| <i>ADH1C</i>   | 4          | 100257649       | 100274202     |
| <i>ADK</i>     | 10         | 75910943        | 76469061      |
| <i>ADORA1</i>  | 1          | 203096833       | 203136533     |
| <i>ADORA2A</i> | 22         | 24819565        | 24838328      |
| <i>ADORA2B</i> | 17         | 15831097        | 15879210      |
| <i>ADORA3</i>  | 1          | 112042051       | 112046743     |
| <i>ADRA1A</i>  | 8          | 26600364        | 26728525      |
| <i>ADRA1B</i>  | 5          | 159343740       | 159413185     |
| <i>ADRA1D</i>  | 20         | 4201278         | 4229659       |
| <i>ADRA2A</i>  | 10         | 112836790       | 112840665     |
| <i>ADRA2B</i>  | 2          | 96778623        | 96781984      |
| <i>ADRA2C</i>  | 4          | 3768296         | 3770253       |
| <i>ADRB1</i>   | 10         | 115803806       | 115806667     |
| <i>ADRB2</i>   | 5          | 148206156       | 148208197     |
| <i>ADRB3</i>   | 8          | 37820513        | 37824184      |
| <i>ADSS</i>    | 1          | 244571794       | 244615436     |
| <i>ADSSL1</i>  | 14         | 105190534       | 105213662     |
| <i>AGTR1</i>   | 3          | 148415658       | 148460790     |
| <i>AGXT</i>    | 2          | 241808162       | 241818536     |
| <i>AHR</i>     | 7          | 17338276        | 17385775      |
| <i>AKR1A1</i>  | 1          | 46016455        | 46035723      |
| <i>AKR1B1</i>  | 7          | 134127103       | 134143888     |
| <i>AKR1B10</i> | 7          | 134212344       | 134226166     |
| <i>AKR1C1</i>  | 10         | 5005454         | 5020158       |

|                 |    |           |           |
|-----------------|----|-----------|-----------|
| <i>AKR1C2</i>   | 10 | 5029967   | 5060225   |
| <i>AKR1C3</i>   | 10 | 5090958   | 5149878   |
| <i>AKR1D1</i>   | 7  | 137761178 | 137803050 |
| <i>ALB</i>      | 4  | 74269972  | 74287129  |
| <i>ALDH18A1</i> | 10 | 97365686  | 97416567  |
| <i>ALDH1A1</i>  | 9  | 75515578  | 75568233  |
| <i>ALDH1A2</i>  | 15 | 58245622  | 58358121  |
| <i>ALKBH2</i>   | 12 | 109525993 | 109531436 |
| <i>ALKBH3</i>   | 11 | 43902357  | 43941825  |
| <i>ALOX5</i>    | 10 | 45869624  | 45941569  |
| <i>AMN</i>      | 14 | 103388885 | 103397184 |
| <i>AMY2A</i>    | 1  | 104159954 | 104168402 |
| <i>ANG</i>      | 14 | 21152336  | 21162345  |
| <i>ANPEP</i>    | 15 | 90328126  | 90358086  |
| <i>ANXA1</i>    | 9  | 75766647  | 75785309  |
| <i>ANXA2</i>    | 15 | 60639350  | 60690185  |
| <i>AOC3</i>     | 17 | 41003140  | 41010147  |
| <i>APRT</i>     | 16 | 88875877  | 88878342  |
| <i>AQP1</i>     | 7  | 30951415  | 30965131  |
| <i>ARF1</i>     | 1  | 228270361 | 228286913 |
| <i>ARG1</i>     | 6  | 131894343 | 131905472 |
| <i>ASGR2</i>    | 17 | 7004641   | 7018841   |
| <i>ASL</i>      | 7  | 65540776  | 65558330  |
| <i>ASNS</i>     | 7  | 97481429  | 97501854  |
| <i>ASPA</i>     | 17 | 3377404   | 3402700   |
| <i>ASPH</i>     | 8  | 62413115  | 62627199  |
| <i>ASRGL1</i>   | 11 | 62104774  | 62168850  |
| <i>ASS1</i>     | 9  | 133320094 | 133376661 |
| <i>ATF1</i>     | 12 | 51157493  | 51214950  |
| <i>ATF2</i>     | 2  | 175936978 | 176032934 |
| <i>ATF3</i>     | 1  | 212738676 | 212794119 |
| <i>ATF4</i>     | 22 | 39916564  | 39918691  |
| <i>ATF5</i>     | 19 | 50431959  | 50437193  |
| <i>ATF6</i>     | 1  | 161736034 | 161933860 |
| <i>ATF7</i>     | 12 | 53901640  | 54020199  |
| <i>ATM</i>      | 11 | 108093227 | 108239829 |
| <i>ATP1A1</i>   | 1  | 116914807 | 116947396 |
| <i>ATP2C1</i>   | 3  | 130569327 | 130735556 |
| <i>ATP4A</i>    | 19 | 36041095  | 36054560  |
| <i>ATP6V1A</i>  | 3  | 113465866 | 113530905 |
| <i>AVPR1A</i>   | 12 | 63536067  | 63547640  |
| <i>AVPR1B</i>   | 1  | 206224283 | 206231482 |

|                 |    |           |           |
|-----------------|----|-----------|-----------|
| <i>BAAT</i>     | 9  | 104122699 | 104147287 |
| <i>BBOX1</i>    | 11 | 27062252  | 27149354  |
| <i>BCHE</i>     | 3  | 165490692 | 165555260 |
| <i>BCL2</i>     | 18 | 60790579  | 60987011  |
| <i>BDKRB2</i>   | 14 | 96671135  | 96710666  |
| <i>BGLAP</i>    | 1  | 156211951 | 156213123 |
| <i>BHMT</i>     | 5  | 78407604  | 78428113  |
| <i>C1QA</i>     | 1  | 22963118  | 22966175  |
| <i>C1QB</i>     | 1  | 22979672  | 22988045  |
| <i>C1QC</i>     | 1  | 22970118  | 22974603  |
| <i>C1R</i>      | 12 | 7187513   | 7189412   |
| <i>C1S</i>      | 12 | 7167980   | 7178336   |
| <i>C3</i>       | 19 | 6677846   | 6720693   |
| <i>C4A</i>      | 6  | 31949834  | 31970457  |
| <i>C4B</i>      | 6  | 31982572  | 32003195  |
| <i>C5</i>       | 9  | 123714613 | 123837203 |
| <i>C8G</i>      | 9  | 139839327 | 139841426 |
| <i>CA1</i>      | 8  | 86240458  | 86290383  |
| <i>CA10</i>     | 17 | 49707674  | 50237377  |
| <i>CA11</i>     | 19 | 49141272  | 49149451  |
| <i>CA12</i>     | 15 | 63615730  | 63674309  |
| <i>CA13</i>     | 8  | 86157716  | 86196302  |
| <i>CA14</i>     | 1  | 150229554 | 150237478 |
| <i>CA2</i>      | 8  | 86376131  | 86393721  |
| <i>CA3</i>      | 8  | 86351056  | 86361269  |
| <i>CA4</i>      | 17 | 58227302  | 58236907  |
| <i>CA6</i>      | 1  | 9005844   | 9035151   |
| <i>CA7</i>      | 16 | 66878282  | 66888052  |
| <i>CA8</i>      | 8  | 61099906  | 61193954  |
| <i>CA9</i>      | 9  | 35673915  | 35681156  |
| <i>CACNA1A</i>  | 19 | 13317256  | 13617274  |
| <i>CACNA1B</i>  | 9  | 140772241 | 141019076 |
| <i>CACNA1C</i>  | 12 | 2079952   | 2807115   |
| <i>CACNA1D</i>  | 3  | 53529003  | 53847178  |
| <i>CACNA1G</i>  | 17 | 48638429  | 48706986  |
| <i>CACNA1H</i>  | 16 | 1203241   | 1271772   |
| <i>CACNA1I</i>  | 22 | 39953974  | 40085744  |
| <i>CACNA1S</i>  | 1  | 201008635 | 201081694 |
| <i>CACNA2D1</i> | 7  | 81575760  | 82073122  |
| <i>CACNA2D2</i> | 3  | 50400044  | 50541675  |
| <i>CACNA2D3</i> | 3  | 54156620  | 55108584  |
| <i>CACNB1</i>   | 17 | 37329709  | 37353956  |

|                 |    |           |           |
|-----------------|----|-----------|-----------|
| <i>CACNB2</i>   | 10 | 18429606  | 18830688  |
| <i>CACNB3</i>   | 12 | 49208215  | 49222726  |
| <i>CACNB4</i>   | 2  | 152689285 | 152956502 |
| <i>CACNG1</i>   | 17 | 65040652  | 65052913  |
| <i>CAD</i>      | 2  | 27440258  | 27466660  |
| <i>CALCR</i>    | 7  | 93053799  | 93204042  |
| <i>CALM1</i>    | 14 | 90863327  | 90874619  |
| <i>CALR</i>     | 19 | 13049414  | 13055304  |
| <i>CALY</i>     | 10 | 135137576 | 135150475 |
| <i>CANX</i>     | 5  | 179105647 | 179158642 |
| <i>CARTPT</i>   | 5  | 71014990  | 71016875  |
| <i>CASR</i>     | 3  | 121902514 | 122005350 |
| <i>CAST</i>     | 5  | 95997741  | 96110387  |
| <i>CBS</i>      | 21 | 44473301  | 44496978  |
| <i>CCL2</i>     | 17 | 32582296  | 32584222  |
| <i>CCR5</i>     | 3  | 46411633  | 46417697  |
| <i>CD44</i>     | 11 | 35160417  | 35253949  |
| <i>CD55</i>     | 1  | 207494817 | 207534311 |
| <i>CDO1</i>     | 5  | 115140430 | 115152651 |
| <i>CDO1</i>     | 5  | 115149317 | 115151808 |
| <i>CES1</i>     | 16 | 55836763  | 55867098  |
| <i>CFTR</i>     | 7  | 117118394 | 117308719 |
| <i>CHAT</i>     | 10 | 50817141  | 50873150  |
| <i>CHRFAM7A</i> | 15 | 30649973  | 30686052  |
| <i>CHRM1</i>    | 11 | 62676151  | 62689333  |
| <i>CHRM2</i>    | 7  | 136553399 | 136705002 |
| <i>CHRM3</i>    | 1  | 239549818 | 239550527 |
| <i>CHRM3</i>    | 1  | 239549865 | 240074762 |
| <i>CHRM4</i>    | 11 | 46406342  | 46408158  |
| <i>CHRM5</i>    | 15 | 34260446  | 34357295  |
| <i>CHRNA1</i>   | 2  | 175612320 | 175629200 |
| <i>CHRNA10</i>  | 11 | 3686817   | 3694438   |
| <i>CHRNA2</i>   | 8  | 27317278  | 27336813  |
| <i>CHRNA3</i>   | 15 | 78885394  | 78913637  |
| <i>CHRNA4</i>   | 20 | 61974662  | 61992748  |
| <i>CHRNA5</i>   | 15 | 78857862  | 78887611  |
| <i>CHRNA6</i>   | 8  | 42607763  | 42623929  |
| <i>CHRNA7</i>   | 15 | 32322686  | 32464722  |
| <i>CHRNA9</i>   | 4  | 40337346  | 40357234  |
| <i>CHRNB1</i>   | 17 | 7348406   | 7360932   |
| <i>CHRNB2</i>   | 1  | 154540257 | 154552354 |
| <i>CHRNB3</i>   | 8  | 42552562  | 42592550  |

|                |    |           |           |
|----------------|----|-----------|-----------|
| <i>CHRNBA</i>  | 15 | 78915639  | 78947928  |
| <i>CHRND</i>   | 2  | 233390870 | 233401375 |
| <i>CHRNE</i>   | 17 | 4801064   | 4806423   |
| <i>CHRNG</i>   | 2  | 233404437 | 233411038 |
| <i>CHUK</i>    | 10 | 101945870 | 101989367 |
| <i>CKB</i>     | 14 | 103985995 | 103989196 |
| <i>CKM</i>     | 19 | 45809671  | 45826235  |
| <i>CLCN2</i>   | 3  | 184063973 | 184079439 |
| <i>CLCNKA</i>  | 1  | 16348486  | 16360545  |
| <i>CLEC3B</i>  | 3  | 45067759  | 45077563  |
| <i>CNR1</i>    | 6  | 88849583  | 88876464  |
| <i>CNR2</i>    | 1  | 24199953  | 24239817  |
| <i>COL1A1</i>  | 17 | 48261457  | 48279009  |
| <i>COL1A2</i>  | 7  | 94023873  | 94060544  |
| <i>COL2A1</i>  | 12 | 48366748  | 48419069  |
| <i>COL3A1</i>  | 2  | 189839099 | 189877472 |
| <i>COMP</i>    | 19 | 18893583  | 18902114  |
| <i>COMT</i>    | 22 | 19929263  | 19957498  |
| <i>COX6B1</i>  | 19 | 36139125  | 36149686  |
| <i>COX6C</i>   | 8  | 100890223 | 100906242 |
| <i>CP</i>      | 3  | 148880197 | 148939837 |
| <i>CPB1</i>    | 3  | 148508967 | 148577979 |
| <i>CPE</i>     | 4  | 166300097 | 166419482 |
| <i>CRH</i>     | 8  | 67088612  | 67090846  |
| <i>CRYZ</i>    | 1  | 75171166  | 75199092  |
| <i>CSAD</i>    | 12 | 53551447  | 53574693  |
| <i>CTDSP1</i>  | 2  | 219263061 | 219270664 |
| <i>CTH</i>     | 1  | 70876901  | 70905797  |
| <i>CTRB1</i>   | 16 | 75252884  | 75258822  |
| <i>CTSD</i>    | 11 | 1773982   | 1785222   |
| <i>CUBN</i>    | 10 | 16865965  | 17172248  |
| <i>CXCL12</i>  | 10 | 44865601  | 44880545  |
| <i>CXCR1</i>   | 2  | 219027568 | 219031716 |
| <i>CXCR4</i>   | 2  | 136871919 | 136875725 |
| <i>CYBA</i>    | 16 | 88709697  | 88717493  |
| <i>CYP19A1</i> | 15 | 51500254  | 51630795  |
| <i>CYP1A2</i>  | 15 | 75041184  | 75048941  |
| <i>CYP21A2</i> | 6  | 32006093  | 32009447  |
| <i>CYP2C19</i> | 10 | 96522438  | 96612962  |
| <i>CYP2C8</i>  | 10 | 96796529  | 96829255  |
| <i>CYP2D6</i>  | 22 | 42521661  | 42531387  |
| <i>CYP3A4</i>  | 7  | 99354583  | 99381811  |



|                |    |           |           |
|----------------|----|-----------|-----------|
| <i>CYP3A5</i>  | 7  | 99245812  | 99277649  |
| <i>CYP51A1</i> | 7  | 91741463  | 91764059  |
| <i>CYSLTR2</i> | 13 | 49280951  | 49283498  |
| <i>DBH</i>     | 9  | 136501485 | 136524466 |
| <i>DDC</i>     | 7  | 50526134  | 50633154  |
| <i>DHFR</i>    | 5  | 79922045  | 79950800  |
| <i>DLG4</i>    | 17 | 7093209   | 7123369   |
| <i>DNMT1</i>   | 19 | 10244021  | 10305755  |
| <i>DNPEP</i>   | 2  | 220238180 | 220264739 |
| <i>DPP4</i>    | 2  | 162848751 | 162931052 |
| <i>DRD1</i>    | 5  | 174867675 | 174871163 |
| <i>DRD2</i>    | 11 | 113280317 | 113346001 |
| <i>DRD3</i>    | 3  | 113846644 | 113918254 |
| <i>DRD4</i>    | 11 | 637305    | 640706    |
| <i>DRD5</i>    | 4  | 9783258   | 9785633   |
| <i>EDNRA</i>   | 4  | 148402069 | 148466106 |
| <i>EDNRB</i>   | 13 | 78469616  | 78549664  |
| <i>EGF</i>     | 4  | 110834039 | 110934118 |
| <i>EGFR</i>    | 7  | 55086725  | 55275031  |
| <i>EGLN1</i>   | 1  | 231499497 | 231560790 |
| <i>EGLN2</i>   | 19 | 41305048  | 41314346  |
| <i>EGLN3</i>   | 14 | 34393421  | 34420289  |
| <i>ELN</i>     | 7  | 73442102  | 73484237  |
| <i>ENPEP</i>   | 4  | 111397229 | 111484493 |
| <i>ENPP1</i>   | 6  | 132129156 | 132216295 |
| <i>EPOR</i>    | 19 | 11487881  | 11495018  |
| <i>EPRS</i>    | 1  | 220141942 | 220220000 |
| <i>EPX</i>     | 17 | 56270089  | 56282535  |
| <i>ESR1</i>    | 6  | 152011631 | 152424409 |
| <i>ESR2</i>    | 14 | 64639643  | 64805268  |
| <i>ESRRA</i>   | 11 | 64073000  | 64084215  |
| <i>ESRRG</i>   | 1  | 216676588 | 217311097 |
| <i>F10</i>     | 13 | 113777113 | 113803843 |
| <i>F11</i>     | 4  | 187187099 | 187210835 |
| <i>F12</i>     | 5  | 176829139 | 176843525 |
| <i>F2</i>      | 11 | 46740742  | 46761056  |
| <i>F2R</i>     | 5  | 76011868  | 76031595  |
| <i>F5</i>      | 1  | 169481192 | 169555769 |
| <i>F7</i>      | 13 | 113760102 | 113774995 |
| <i>FAAH</i>    | 1  | 46859939  | 46879520  |
| <i>FABP6</i>   | 5  | 159614374 | 159665729 |
| <i>FADS1</i>   | 11 | 61567097  | 61584529  |

|               |    |           |           |
|---------------|----|-----------|-----------|
| <i>FASN</i>   | 17 | 80036214  | 80056165  |
| <i>FCER1A</i> | 1  | 159253678 | 159278014 |
| <i>FCGR1A</i> | 1  | 149752831 | 149764074 |
| <i>FCGR2A</i> | 1  | 161475205 | 161493838 |
| <i>FCGR2B</i> | 1  | 161632905 | 161648444 |
| <i>FCGR2C</i> | 1  | 161551129 | 161571010 |
| <i>FCGR3A</i> | 1  | 161511549 | 161520413 |
| <i>FCGR3B</i> | 1  | 161592986 | 161601753 |
| <i>FDPS</i>   | 1  | 155278539 | 155290457 |
| <i>FFAR1</i>  | 19 | 35842445  | 35843367  |
| <i>FGA</i>    | 4  | 155504280 | 155511897 |
| <i>FGB</i>    | 4  | 155484132 | 155493915 |
| <i>FGF1</i>   | 5  | 141971743 | 142077635 |
| <i>FGF2</i>   | 4  | 123747863 | 123819390 |
| <i>FGF4</i>   | 11 | 69573811  | 69590171  |
| <i>FGG</i>    | 4  | 155525286 | 155533902 |
| <i>FKBP1A</i> | 20 | 1349621   | 1373816   |
| <i>FOLH1</i>  | 11 | 49168187  | 49230222  |
| <i>FOS</i>    | 14 | 75745481  | 75748937  |
| <i>FPR1</i>   | 19 | 52249023  | 52255150  |
| <i>FSHR</i>   | 2  | 49093574  | 49381666  |
| <i>FTCD</i>   | 21 | 47556065  | 47575770  |
| <i>FXD2</i>   | 11 | 117690790 | 117698807 |
| <i>GAA</i>    | 17 | 78075330  | 78093680  |
| <i>GABBR1</i> | 6  | 29570005  | 29600962  |
| <i>GABBR2</i> | 9  | 101050364 | 101471479 |
| <i>GABRA1</i> | 5  | 161274197 | 161326965 |
| <i>GABRA2</i> | 4  | 46245565  | 46392056  |
| <i>GABRA4</i> | 4  | 46920917  | 46996424  |
| <i>GABRA5</i> | 15 | 27111866  | 27194357  |
| <i>GABRA6</i> | 5  | 161112658 | 161129598 |
| <i>GABRB1</i> | 4  | 46995875  | 47429360  |
| <i>GABRB2</i> | 5  | 160715426 | 160975130 |
| <i>GABRB3</i> | 15 | 26788693  | 27018935  |
| <i>GABRD</i>  | 1  | 1950768   | 1962192   |
| <i>GABRG1</i> | 4  | 46037786  | 46126082  |
| <i>GABRG2</i> | 5  | 161494648 | 161582545 |
| <i>GABRG3</i> | 15 | 27216429  | 27779041  |
| <i>GABRP</i>  | 5  | 170199570 | 170241051 |
| <i>GABRR1</i> | 6  | 89887223  | 89941007  |
| <i>GABRR2</i> | 6  | 89965780  | 90025018  |
| <i>GABRR3</i> | 3  | 97705527  | 97754148  |

|                |    |           |           |
|----------------|----|-----------|-----------|
| <i>GAD1</i>    | 2  | 171669720 | 171717661 |
| <i>GAD2</i>    | 10 | 26505236  | 26593491  |
| <i>GAMT</i>    | 19 | 1397025   | 1401569   |
| <i>GANAB</i>   | 11 | 62392298  | 62414198  |
| <i>GANC</i>    | 15 | 42565856  | 42645864  |
| <i>GARS</i>    | 7  | 30634181  | 30673649  |
| <i>GCGR</i>    | 17 | 79762008  | 79771889  |
| <i>GCLC</i>    | 6  | 53362139  | 53409927  |
| <i>GCLM</i>    | 1  | 94350761  | 94375154  |
| <i>GGCX</i>    | 2  | 85771978  | 85788657  |
| <i>GGPS1</i>   | 1  | 235491753 | 235507847 |
| <i>GHR</i>     | 5  | 42423877  | 42721980  |
| <i>GHRHR</i>   | 7  | 31003636  | 31019146  |
| <i>GJA1</i>    | 6  | 121756723 | 121770890 |
| <i>GLO1</i>    | 6  | 38643701  | 38670952  |
| <i>GLP1R</i>   | 6  | 39016557  | 39059079  |
| <i>GLP2R</i>   | 17 | 9728860   | 9795421   |
| <i>GLRA1</i>   | 5  | 151202074 | 151304427 |
| <i>GLRA3</i>   | 4  | 175545292 | 175750466 |
| <i>GLRB</i>    | 4  | 157997277 | 158093251 |
| <i>GLUL</i>    | 1  | 182347228 | 182361341 |
| <i>GLYAT</i>   | 11 | 58476230  | 58499447  |
| <i>GLYATL1</i> | 11 | 58695102  | 58724547  |
| <i>GLYATL2</i> | 11 | 58601538  | 58612281  |
| <i>GMPS</i>    | 3  | 155587219 | 155657397 |
| <i>GNG2</i>    | 14 | 52313849  | 52436518  |
| <i>GNMT</i>    | 6  | 42907153  | 42931618  |
| <i>GNRHR</i>   | 4  | 68603093  | 68621804  |
| <i>GNRHR2</i>  | 1  | 145509752 | 145516076 |
| <i>GP9</i>     | 3  | 128774292 | 128781254 |
| <i>GPR18</i>   | 13 | 99906967  | 99914702  |
| <i>GPRC5A</i>  | 12 | 13043956  | 13066600  |
| <i>GPT</i>     | 8  | 145727604 | 145732557 |
| <i>GPT2</i>    | 16 | 46918308  | 46965201  |
| <i>GRIA1</i>   | 5  | 152869256 | 153193433 |
| <i>GRIA2</i>   | 4  | 158141736 | 158287227 |
| <i>GRIA4</i>   | 11 | 105480721 | 105852819 |
| <i>GRM1</i>    | 6  | 146285905 | 146758734 |
| <i>GRM4</i>    | 6  | 33986420  | 34123399  |
| <i>GRM5</i>    | 11 | 88237744  | 88799129  |
| <i>GRM7</i>    | 3  | 6902784   | 7783218   |
| <i>GRM8</i>    | 7  | 126078652 | 126893348 |

|                 |    |           |           |
|-----------------|----|-----------|-----------|
| <i>GSK3B</i>    | 3  | 119540168 | 119813264 |
| <i>GSS</i>      | 20 | 33516236  | 33543795  |
| <i>GSTA2</i>    | 6  | 52614885  | 52628361  |
| <i>GSTP1</i>    | 11 | 67351066  | 67354124  |
| <i>GUCY1A2</i>  | 11 | 106544738 | 106889171 |
| <i>GUCY2C</i>   | 12 | 14765566  | 14849552  |
| <i>HABP2</i>    | 10 | 115310590 | 115349361 |
| <i>HABP4</i>    | 9  | 99212437  | 99253618  |
| <i>HAPLN1</i>   | 5  | 82934017  | 83016896  |
| <i>HAPLN3</i>   | 15 | 89420519  | 89438857  |
| <i>HAPLN4</i>   | 19 | 19366450  | 19373596  |
| <i>HBA1</i>     | 16 | 226650    | 227521    |
| <i>HDAC2</i>    | 6  | 114257320 | 114292359 |
| <i>HDAC9</i>    | 7  | 18126565  | 19039144  |
| <i>HGS</i>      | 17 | 79650962  | 79669151  |
| <i>HIF1A</i>    | 14 | 62162119  | 62214977  |
| <i>HMGCR</i>    | 5  | 74632159  | 74657926  |
| <i>HMMR</i>     | 5  | 162887517 | 162918951 |
| <i>HNMT</i>     | 2  | 138721808 | 138773934 |
| <i>HPGDS</i>    | 4  | 95219707  | 95264027  |
| <i>HRH1</i>     | 3  | 11178779  | 11304939  |
| <i>HRH2</i>     | 5  | 175084799 | 175137759 |
| <i>HRH3</i>     | 20 | 60789822  | 60795334  |
| <i>HRH4</i>     | 18 | 22040532  | 22067391  |
| <i>HS3ST3A1</i> | 17 | 13397349  | 13505291  |
| <i>HSD11B1</i>  | 1  | 209859525 | 209908295 |
| <i>HSP90AA1</i> | 14 | 102547075 | 102606096 |
| <i>HSP90B1</i>  | 12 | 104324112 | 104341708 |
| <i>HSPA5</i>    | 9  | 127997127 | 128003666 |
| <i>HTR1A</i>    | 5  | 63255875  | 63258119  |
| <i>HTR1B</i>    | 6  | 78171948  | 78173120  |
| <i>HTR1D</i>    | 1  | 23518388  | 23521222  |
| <i>HTR1E</i>    | 6  | 87647024  | 87726397  |
| <i>HTR1F</i>    | 3  | 87841917  | 88044006  |
| <i>HTR2A</i>    | 13 | 47405677  | 47471211  |
| <i>HTR2B</i>    | 2  | 231972944 | 231990492 |
| <i>HTR3A</i>    | 11 | 113845797 | 113861035 |
| <i>HTR3B</i>    | 11 | 113769645 | 113817283 |
| <i>HTR3C</i>    | 3  | 183770835 | 183778461 |
| <i>HTR3D</i>    | 3  | 183749332 | 183757157 |
| <i>HTR3E</i>    | 3  | 183814852 | 183824783 |
| <i>HTR4</i>     | 5  | 147830595 | 148034090 |

|               |    |           |           |
|---------------|----|-----------|-----------|
| <i>HTR5A</i>  | 7  | 154862034 | 154879102 |
| <i>HTR6</i>   | 1  | 19991780  | 20007459  |
| <i>HTR7</i>   | 10 | 92500575  | 92617671  |
| <i>ICAM1</i>  | 19 | 10381517  | 10397291  |
| <i>IDE</i>    | 10 | 94211441  | 94333852  |
| <i>IFNG</i>   | 12 | 68548550  | 68553521  |
| <i>IGF1R</i>  | 15 | 99191768  | 99507759  |
| <i>IGF2R</i>  | 6  | 160390131 | 160527583 |
| <i>IGFBP3</i> | 7  | 45951844  | 45960871  |
| <i>IGFBP7</i> | 4  | 57897237  | 57976551  |
| <i>IKKBK</i>  | 8  | 42128820  | 42190171  |
| <i>IL2</i>    | 4  | 123372625 | 123377650 |
| <i>IL4I1</i>  | 19 | 50392911  | 50432796  |
| <i>IL5</i>    | 5  | 131877136 | 131892582 |
| <i>IMPA1</i>  | 8  | 82569151  | 82598589  |
| <i>IMPA2</i>  | 18 | 11981427  | 12030885  |
| <i>IMPDH1</i> | 7  | 128032331 | 128050041 |
| <i>IMPG2</i>  | 3  | 100941390 | 101039419 |
| <i>INSR</i>   | 19 | 7112266   | 7294011   |
| <i>ISYNA1</i> | 19 | 18545198  | 18549111  |
| <i>ITGA2B</i> | 17 | 42449549  | 42466873  |
| <i>ITGA4</i>  | 2  | 182321619 | 182402474 |
| <i>ITGAL</i>  | 16 | 30483983  | 30534506  |
| <i>ITGB2</i>  | 21 | 46305864  | 46348788  |
| <i>ITGB3</i>  | 17 | 45331208  | 45390077  |
| <i>ITPA</i>   | 20 | 3189514   | 3208095   |
| <i>JDP2</i>   | 14 | 75894509  | 75939404  |
| <i>JUN</i>    | 1  | 59246463  | 59249785  |
| <i>KARS</i>   | 16 | 75661622  | 75681585  |
| <i>KCNA1</i>  | 12 | 5019073   | 5027422   |
| <i>KCNA10</i> | 1  | 111059839 | 111061797 |
| <i>KCNA2</i>  | 1  | 111136202 | 111174136 |
| <i>KCNA3</i>  | 1  | 111196182 | 111217655 |
| <i>KCNA4</i>  | 11 | 30031288  | 30038577  |
| <i>KCNA5</i>  | 12 | 5153085   | 5155954   |
| <i>KCNA6</i>  | 12 | 4916051   | 4960280   |
| <i>KCNA7</i>  | 19 | 49570675  | 49576198  |
| <i>KCNB1</i>  | 20 | 47980414  | 48100579  |
| <i>KCNB2</i>  | 8  | 73449626  | 73850584  |
| <i>KCNC1</i>  | 11 | 17757457  | 17885835  |
| <i>KCNC2</i>  | 12 | 75433858  | 75603528  |
| <i>KCNC3</i>  | 19 | 50815199  | 50836772  |

|               |    |           |           |
|---------------|----|-----------|-----------|
| <i>KCND2</i>  | 7  | 119913695 | 120390387 |
| <i>KCND3</i>  | 1  | 112318444 | 112532198 |
| <i>KCNE1</i>  | 21 | 35791013  | 35884573  |
| <i>KCNH2</i>  | 7  | 150642044 | 150675402 |
| <i>KCNH6</i>  | 17 | 61600695  | 61626338  |
| <i>KCNH7</i>  | 2  | 163227917 | 163695257 |
| <i>KCNJ1</i>  | 11 | 128707909 | 128737268 |
| <i>KCNJ10</i> | 1  | 160007257 | 160040051 |
| <i>KCNJ11</i> | 11 | 17386371  | 17410878  |
| <i>KCNJ12</i> | 17 | 21279699  | 21323184  |
| <i>KCNJ14</i> | 19 | 48958964  | 48969367  |
| <i>KCNJ15</i> | 21 | 39601837  | 39675048  |
| <i>KCNJ3</i>  | 2  | 155555093 | 155714864 |
| <i>KCNJ5</i>  | 11 | 128761313 | 128791058 |
| <i>KCNJ6</i>  | 21 | 38989784  | 39292034  |
| <i>KCNJ8</i>  | 12 | 21917889  | 21928436  |
| <i>KCNK1</i>  | 1  | 233749750 | 233808258 |
| <i>KCNK2</i>  | 1  | 215175982 | 215410436 |
| <i>KCNK3</i>  | 2  | 26915581  | 26954066  |
| <i>KCNK6</i>  | 19 | 38810454  | 38819654  |
| <i>KCNK9</i>  | 8  | 140613081 | 140715311 |
| <i>KCNMA1</i> | 10 | 78629359  | 79397577  |
| <i>KCNMB1</i> | 5  | 169805165 | 169816681 |
| <i>KCNMB2</i> | 3  | 178254086 | 178562217 |
| <i>KCNMB3</i> | 3  | 178957537 | 178984838 |
| <i>KCNMB4</i> | 12 | 70760003  | 70828072  |
| <i>KCNN1</i>  | 19 | 18062111  | 18109930  |
| <i>KCNN2</i>  | 5  | 113391703 | 113832197 |
| <i>KCNN3</i>  | 1  | 154669938 | 154842754 |
| <i>KCNN4</i>  | 19 | 44270685  | 44286291  |
| <i>KCNQ1</i>  | 11 | 2466221   | 2870340   |
| <i>KCNQ2</i>  | 20 | 62031561  | 62103993  |
| <i>KCNQ3</i>  | 8  | 133133105 | 133493004 |
| <i>KCNQ4</i>  | 1  | 41249684  | 41306124  |
| <i>KCNQ5</i>  | 6  | 73331008  | 73908574  |
| <i>KLK1</i>   | 19 | 51322402  | 51327043  |
| <i>LAYN</i>   | 11 | 111409710 | 111432470 |
| <i>LCT</i>    | 2  | 136545415 | 136594750 |
| <i>LGSN</i>   | 6  | 63985856  | 64277826  |
| <i>LHCGR</i>  | 2  | 48913913  | 48982880  |
| <i>LIPF</i>   | 10 | 90424146  | 90438572  |
| <i>LMAN1</i>  | 18 | 56995055  | 57026508  |

|                |    |           |           |
|----------------|----|-----------|-----------|
| <i>LPA</i>     | 6  | 160952515 | 161087407 |
| <i>LPL</i>     | 8  | 19796582  | 19824770  |
| <i>LRP1</i>    | 12 | 57522282  | 57607142  |
| <i>LRP2</i>    | 2  | 169983619 | 170219123 |
| <i>LSM6</i>    | 4  | 147096835 | 147111213 |
| <i>LTA4H</i>   | 12 | 96394531  | 96437298  |
| <i>LTF</i>     | 3  | 46477496  | 46506632  |
| <i>LTF</i>     | 3  | 46509625  | 46526724  |
| <i>LYZ</i>     | 12 | 69742134  | 69748013  |
| <i>MAPK1</i>   | 22 | 22113946  | 22221970  |
| <i>MAPK3</i>   | 16 | 30125426  | 30134630  |
| <i>MC2R</i>    | 18 | 13882043  | 13915706  |
| <i>MCFD2</i>   | 2  | 47129009  | 47168994  |
| <i>METAP2</i>  | 12 | 95867822  | 95909615  |
| <i>MGMT</i>    | 10 | 131265454 | 131566306 |
| <i>MIF</i>     | 22 | 24236565  | 24237409  |
| <i>MLNR</i>    | 13 | 49794474  | 49796513  |
| <i>MMACHC</i>  | 1  | 45965856  | 45976739  |
| <i>MMP12</i>   | 11 | 102733464 | 102745764 |
| <i>MMP2</i>    | 16 | 55512742  | 55540603  |
| <i>MPL</i>     | 1  | 43803089  | 43820135  |
| <i>MPO</i>     | 17 | 56347216  | 56361674  |
| <i>MS4A2</i>   | 11 | 59855734  | 59865940  |
| <i>MTHFR</i>   | 1  | 11845787  | 11866160  |
| <i>MTNR1A</i>  | 4  | 187454154 | 187476537 |
| <i>MTNR1B</i>  | 11 | 92702789  | 92719406  |
| <i>MTOR</i>    | 1  | 11166588  | 11322614  |
| <i>MTR</i>     | 1  | 236957604 | 237067281 |
| <i>MTRR</i>    | 5  | 7851299   | 7901237   |
| <i>MTTP</i>    | 4  | 100485235 | 100545154 |
| <i>MYC</i>     | 8  | 128748315 | 128753680 |
| <i>NADSYN1</i> | 11 | 71164217  | 71212584  |
| <i>NAGA</i>    | 22 | 42454338  | 42466875  |
| <i>NAGK</i>    | 2  | 71295371  | 71305998  |
| <i>NAGLU</i>   | 17 | 40687951  | 40696467  |
| <i>NAGPA</i>   | 16 | 5074845   | 5083942   |
| <i>NCAN</i>    | 19 | 19322773  | 19363061  |
| <i>NCF1</i>    | 7  | 74188309  | 74203720  |
| <i>NCF2</i>    | 1  | 183524697 | 183560056 |
| <i>NCF4</i>    | 22 | 37257030  | 37274059  |
| <i>NDUFC2</i>  | 11 | 77779393  | 77791265  |
| <i>NEU1</i>    | 6  | 31826829  | 31830709  |

|               |    |           |           |
|---------------|----|-----------|-----------|
| <i>NEU2</i>   | 2  | 233887766 | 233900242 |
| <i>NFKB1</i>  | 4  | 103422486 | 103538459 |
| <i>NGF</i>    | 1  | 115828537 | 115881005 |
| <i>NID1</i>   | 1  | 236139130 | 236228481 |
| <i>NISCH</i>  | 3  | 52489524  | 52527088  |
| <i>NOV</i>    | 8  | 120428552 | 120436678 |
| <i>NPC1L1</i> | 7  | 44552134  | 44580929  |
| <i>NPPB</i>   | 1  | 11917521  | 11918992  |
| <i>NPR1</i>   | 1  | 153651093 | 153666468 |
| <i>NPR2</i>   | 9  | 35752942  | 35809728  |
| <i>NPR3</i>   | 5  | 32689182  | 32791830  |
| <i>NPSR1</i>  | 7  | 34697851  | 34917944  |
| <i>NQO1</i>   | 16 | 69743304  | 69760571  |
| <i>NQO2</i>   | 6  | 2988874   | 3020110   |
| <i>NR1H4</i>  | 12 | 100867537 | 100957645 |
| <i>NR1I2</i>  | 3  | 119499331 | 119537332 |
| <i>NR3C1</i>  | 5  | 142657496 | 142815077 |
| <i>NR3C2</i>  | 4  | 148999915 | 149366430 |
| <i>NRP1</i>   | 10 | 33466419  | 33623833  |
| <i>NT5C2</i>  | 10 | 104847774 | 104953063 |
| <i>NT5E</i>   | 6  | 86159302  | 86205509  |
| <i>NTRK1</i>  | 1  | 156785542 | 156851642 |
| <i>NTRK2</i>  | 9  | 87283373  | 87641985  |
| <i>NTSR2</i>  | 2  | 11798304  | 11810329  |
| <i>OAZ1</i>   | 19 | 2269485   | 2273487   |
| <i>OAZ2</i>   | 15 | 64979773  | 64995480  |
| <i>OAZ3</i>   | 1  | 151735445 | 151743806 |
| <i>OGFOD1</i> | 16 | 56485329  | 56511407  |
| <i>OGFOD2</i> | 12 | 123459250 | 123464588 |
| <i>OPLAH</i>  | 8  | 145106167 | 145118929 |
| <i>OPRD1</i>  | 1  | 29138654  | 29190208  |
| <i>OPRK1</i>  | 8  | 54138276  | 54164257  |
| <i>OPRM1</i>  | 6  | 154331631 | 154568001 |
| <i>ORM1</i>   | 9  | 117085303 | 117088759 |
| <i>ORM2</i>   | 9  | 117092069 | 117095536 |
| <i>OXT</i>    | 20 | 3049517   | 3053163   |
| <i>OXTR</i>   | 3  | 8792094   | 8896233   |
| <i>P2RY12</i> | 3  | 151054631 | 151102600 |
| <i>P2RY2</i>  | 11 | 72927493  | 72953472  |
| <i>P4HA1</i>  | 10 | 74766975  | 74856732  |
| <i>P4HB</i>   | 17 | 79801034  | 79818544  |
| <i>P4HTM</i>  | 3  | 49026533  | 49044582  |



|                 |    |           |           |
|-----------------|----|-----------|-----------|
| <i>PADI4</i>    | 1  | 17634690  | 17690499  |
| <i>PAEP</i>     | 9  | 138453600 | 138458622 |
| <i>PAH</i>      | 12 | 103232099 | 103311381 |
| <i>PAICS</i>    | 4  | 57301915  | 57327534  |
| <i>PAM</i>      | 5  | 102090980 | 102366809 |
| <i>PANX1</i>    | 11 | 93862094  | 93918762  |
| <i>PAPSS1</i>   | 4  | 108534822 | 108641419 |
| <i>PCSK1</i>    | 5  | 95726040  | 95768985  |
| <i>PCSK2</i>    | 20 | 17206752  | 17465223  |
| <i>PCYT1A</i>   | 3  | 195965253 | 196014584 |
| <i>PDXK</i>     | 21 | 45138978  | 45182188  |
| <i>PF4</i>      | 4  | 74846542  | 74847841  |
| <i>PFAS</i>     | 17 | 8152573   | 8173809   |
| <i>PGF</i>      | 14 | 75408533  | 75422467  |
| <i>PGR</i>      | 11 | 100900355 | 101001399 |
| <i>PHOSPHO1</i> | 17 | 47300728  | 47309054  |
| <i>PIK3R1</i>   | 5  | 67511584  | 67597649  |
| <i>PIK3R2</i>   | 19 | 18263988  | 18281343  |
| <i>PIK3R3</i>   | 1  | 46505812  | 46642167  |
| <i>PIPOX</i>    | 17 | 27369918  | 27384236  |
| <i>PLA2G1B</i>  | 12 | 120759914 | 120765592 |
| <i>PLA2G2E</i>  | 1  | 20246800  | 20250110  |
| <i>PLA2G4A</i>  | 1  | 186798032 | 186958113 |
| <i>PLAT</i>     | 8  | 42032236  | 42065194  |
| <i>PLAU</i>     | 10 | 75668940  | 75677259  |
| <i>PLAUR</i>    | 19 | 44150247  | 44174498  |
| <i>PLD1</i>     | 3  | 171318195 | 171528284 |
| <i>PLD2</i>     | 17 | 4710396   | 4726727   |
| <i>PLEKHA1</i>  | 10 | 124134094 | 124191871 |
| <i>PLG</i>      | 6  | 161123225 | 161175086 |
| <i>PNLIP</i>    | 10 | 118305428 | 118327367 |
| <i>PNP</i>      | 14 | 20937538  | 20946165  |
| <i>POMC</i>     | 2  | 25383722  | 25391740  |
| <i>PON1</i>     | 7  | 94927669  | 94953884  |
| <i>PPARA</i>    | 22 | 46546450  | 46639653  |
| <i>PPARD</i>    | 6  | 35310335  | 35395968  |
| <i>PPARG</i>    | 3  | 12329349  | 12512512  |
| <i>PRKAA1</i>   | 5  | 40759481  | 40798297  |
| <i>PRKAB1</i>   | 12 | 120105669 | 120119429 |
| <i>PRKCA</i>    | 17 | 64298900  | 64806862  |
| <i>PRKCD</i>    | 3  | 53195223  | 53226733  |
| <i>PRKDC</i>    | 8  | 48685669  | 48872743  |

|                |    |           |           |
|----------------|----|-----------|-----------|
| <i>PRLR</i>    | 5  | 35048861  | 35230691  |
| <i>PROC</i>    | 2  | 128175981 | 128186822 |
| <i>PROCR</i>   | 20 | 33759740  | 33803792  |
| <i>PROS1</i>   | 3  | 93591881  | 93692934  |
| <i>PROZ</i>    | 13 | 113809375 | 113826700 |
| <i>PRSS1</i>   | 7  | 142448082 | 142460927 |
| <i>PSAT1</i>   | 9  | 80911991  | 80945009  |
| <i>PTGDR</i>   | 14 | 52733974  | 52743442  |
| <i>PTGER1</i>  | 19 | 14583278  | 14586174  |
| <i>PTGER2</i>  | 14 | 52781016  | 52795324  |
| <i>PTGER3</i>  | 1  | 71318036  | 71513497  |
| <i>PTGER4</i>  | 5  | 40679600  | 40741866  |
| <i>PTGFR</i>   | 1  | 78941925  | 79006386  |
| <i>PTGIR</i>   | 19 | 47113297  | 47128375  |
| <i>PTGIS</i>   | 20 | 48120411  | 48184707  |
| <i>PTGR2</i>   | 14 | 74318534  | 74352168  |
| <i>PTGS1</i>   | 9  | 125132809 | 125157984 |
| <i>PTGS2</i>   | 1  | 186640944 | 186649559 |
| <i>PTH1R</i>   | 3  | 46919207  | 46945289  |
| <i>PTH2R</i>   | 2  | 209224569 | 209359231 |
| <i>PTPN1</i>   | 20 | 49126858  | 49201299  |
| <i>PTPN4</i>   | 2  | 120517207 | 120742475 |
| <i>PTPRE</i>   | 10 | 129705325 | 129884180 |
| <i>PTPRS</i>   | 19 | 5205514   | 5340814   |
| <i>RAC1</i>    | 7  | 6414126   | 6443598   |
| <i>RAC2</i>    | 22 | 37621301  | 37640339  |
| <i>RAMP1</i>   | 2  | 238768187 | 238820756 |
| <i>RAMP2</i>   | 17 | 40913212  | 40915059  |
| <i>RAMP3</i>   | 7  | 45197367  | 45223849  |
| <i>RARA</i>    | 17 | 38465423  | 38513895  |
| <i>RARB</i>    | 3  | 24870835  | 25162112  |
| <i>RARB</i>    | 3  | 25215823  | 25639423  |
| <i>RARG</i>    | 12 | 53604350  | 53626040  |
| <i>RARRES1</i> | 3  | 158414681 | 158450480 |
| <i>RB1</i>     | 13 | 48877883  | 49056026  |
| <i>RBP1</i>    | 3  | 139236276 | 139258671 |
| <i>REN</i>     | 1  | 204123944 | 204135465 |
| <i>RHO</i>     | 3  | 129247482 | 129254187 |
| <i>RHOB</i>    | 2  | 20646832  | 20649206  |
| <i>RNASE1</i>  | 14 | 21269515  | 21271036  |
| <i>RNASE3</i>  | 14 | 21359562  | 21360507  |
| <i>RORB</i>    | 9  | 77112252  | 77302117  |

|                 |    |           |           |
|-----------------|----|-----------|-----------|
| <i>RXRA</i>     | 9  | 137218309 | 137332432 |
| <i>RXRB</i>     | 6  | 33161362  | 33168630  |
| <i>RXRG</i>     | 1  | 165370159 | 165414592 |
| <i>RYR1</i>     | 19 | 38924340  | 39078204  |
| <i>S100A1</i>   | 1  | 153600873 | 153604513 |
| <i>S100A12</i>  | 1  | 153346184 | 153348075 |
| <i>S100A13</i>  | 1  | 153591275 | 153606568 |
| <i>S100A2</i>   | 1  | 153533584 | 153538306 |
| <i>S100A4</i>   | 1  | 153516095 | 153518282 |
| <i>S100B</i>    | 21 | 48018531  | 48025035  |
| <i>S100P</i>    | 4  | 6695566   | 6698897   |
| <i>SCN10A</i>   | 3  | 38738382  | 38835501  |
| <i>SCN11A</i>   | 3  | 38887260  | 38995142  |
| <i>SCN1A</i>    | 2  | 166845670 | 167005782 |
| <i>SCN1B</i>    | 19 | 35521592  | 35531353  |
| <i>SCN2A</i>    | 2  | 165986659 | 166248820 |
| <i>SCN2B</i>    | 11 | 118033519 | 118047337 |
| <i>SCN3A</i>    | 2  | 165944030 | 166060598 |
| <i>SCN3B</i>    | 11 | 123499895 | 123525315 |
| <i>SCN4A</i>    | 17 | 62015914  | 62067510  |
| <i>SCN4B</i>    | 11 | 118004092 | 118023630 |
| <i>SCN5A</i>    | 3  | 38589549  | 38691164  |
| <i>SCN7A</i>    | 2  | 167259978 | 167350768 |
| <i>SCN8A</i>    | 12 | 51983977  | 52206648  |
| <i>SCN9A</i>    | 2  | 167051695 | 167232497 |
| <i>SCNN1A</i>   | 12 | 6456009   | 6486523   |
| <i>SCNN1B</i>   | 16 | 23313591  | 23392620  |
| <i>SCNN1D</i>   | 1  | 1215795   | 1227409   |
| <i>SCNN1G</i>   | 16 | 23194040  | 23228200  |
| <i>SELE</i>     | 1  | 169691781 | 169703220 |
| <i>SELP</i>     | 1  | 169558087 | 169599377 |
| <i>SERPINA5</i> | 14 | 95047706  | 95059457  |
| <i>SERPINB2</i> | 18 | 61554939  | 61571124  |
| <i>SERPINB6</i> | 6  | 2948393   | 2972399   |
| <i>SERPINC1</i> | 1  | 173872938 | 173886516 |
| <i>SERPIND1</i> | 22 | 21128383  | 21142008  |
| <i>SERPINE1</i> | 7  | 100770370 | 100782547 |
| <i>SHBG</i>     | 17 | 7517382   | 7536701   |
| <i>SIGMAR1</i>  | 9  | 34634719  | 34637823  |
| <i>SLC12A1</i>  | 15 | 48498498  | 48596275  |
| <i>SLC12A2</i>  | 5  | 127419483 | 127525380 |
| <i>SLC12A3</i>  | 16 | 56899119  | 56949762  |

|                 |    |           |           |
|-----------------|----|-----------|-----------|
| <i>SLC12A4</i>  | 16 | 67977377  | 68002597  |
| <i>SLC12A5</i>  | 20 | 44650329  | 44688789  |
| <i>SLC15A1</i>  | 13 | 99336055  | 99404929  |
| <i>SLC15A2</i>  | 3  | 121613171 | 121663034 |
| <i>SLC18A1</i>  | 8  | 20002366  | 20040849  |
| <i>SLC18A2</i>  | 10 | 119000584 | 119038941 |
| <i>SLC19A3</i>  | 2  | 228549926 | 228582745 |
| <i>SLC1A1</i>   | 9  | 4490427   | 4587469   |
| <i>SLC1A2</i>   | 11 | 35272752  | 35441610  |
| <i>SLC1A3</i>   | 5  | 36606457  | 36688436  |
| <i>SLC1A6</i>   | 19 | 15060845  | 15121455  |
| <i>SLC1A7</i>   | 1  | 53552851  | 53608304  |
| <i>SLC22A11</i> | 11 | 64323098  | 64340347  |
| <i>SLC22A6</i>  | 11 | 62744069  | 62752495  |
| <i>SLC22A7</i>  | 6  | 43263448  | 43273276  |
| <i>SLC22A8</i>  | 11 | 62760296  | 62783317  |
| <i>SLC23A1</i>  | 5  | 138702885 | 138720242 |
| <i>SLC25A12</i> | 2  | 172639915 | 172750816 |
| <i>SLC25A13</i> | 7  | 95749532  | 95951459  |
| <i>SLC25A15</i> | 13 | 41363547  | 41386596  |
| <i>SLC25A18</i> | 22 | 18042865  | 18073656  |
| <i>SLC25A2</i>  | 5  | 140682196 | 140683630 |
| <i>SLC25A22</i> | 11 | 790475    | 798269    |
| <i>SLC25A4</i>  | 4  | 186064417 | 186071538 |
| <i>SLC29A1</i>  | 6  | 44187242  | 44201888  |
| <i>SLC32A1</i>  | 20 | 37353105  | 37358015  |
| <i>SLC36A1</i>  | 5  | 150790905 | 150941522 |
| <i>SLC47A1</i>  | 17 | 19437167  | 19482346  |
| <i>SLC52A2</i>  | 8  | 145582217 | 145584946 |
| <i>SLC6A1</i>   | 3  | 11034415  | 11080935  |
| <i>SLC6A2</i>   | 16 | 55689516  | 55740104  |
| <i>SLC6A3</i>   | 5  | 1392905   | 1445543   |
| <i>SLC6A4</i>   | 17 | 28521337  | 28562986  |
| <i>SLC6A5</i>   | 11 | 20620946  | 20680831  |
| <i>SLC6A9</i>   | 1  | 44462155  | 44497164  |
| <i>SLC7A1</i>   | 13 | 30083547  | 30169825  |
| <i>SLC7A11</i>  | 4  | 139085248 | 139233814 |
| <i>SLC7A2</i>   | 8  | 17354597  | 17428077  |
| <i>SLC7A4</i>   | 22 | 21383007  | 21386847  |
| <i>SLC8A1</i>   | 2  | 40339286  | 40739626  |
| <i>SLC9A1</i>   | 1  | 27425300  | 27481621  |
| <i>SLCO1A2</i>  | 12 | 21417534  | 21556591  |

|                 |    |           |           |
|-----------------|----|-----------|-----------|
| <i>SLCO1B1</i>  | 12 | 21284128  | 21392730  |
| <i>SLCO1B3</i>  | 12 | 20963638  | 21069845  |
| <i>SLCO2B1</i>  | 11 | 74862032  | 74917445  |
| <i>SMO</i>      | 7  | 128828713 | 128853387 |
| <i>SMPD1</i>    | 11 | 6411531   | 6416228   |
| <i>SNAP25</i>   | 20 | 10199477  | 10288068  |
| <i>SOAT1</i>    | 1  | 179262849 | 179327815 |
| <i>SQLE</i>     | 8  | 126010720 | 126034526 |
| <i>SRC</i>      | 20 | 35973088  | 36033835  |
| <i>SRD5A1</i>   | 5  | 6633473   | 6669675   |
| <i>SRD5A2</i>   | 2  | 31747558  | 31925853  |
| <i>SSTR1</i>    | 14 | 38677204  | 38682268  |
| <i>SSTR2</i>    | 17 | 71161160  | 71168094  |
| <i>SSTR3</i>    | 22 | 37600277  | 37616487  |
| <i>SSTR5</i>    | 16 | 1122756   | 1131454   |
| <i>ST14</i>     | 11 | 130029682 | 130080257 |
| <i>STAB2</i>    | 12 | 103981033 | 104160507 |
| <i>SULT1E1</i>  | 4  | 70706930  | 70726483  |
| <i>SV2A</i>     | 1  | 149874870 | 149889434 |
| <i>TAAR1</i>    | 6  | 132966123 | 132967142 |
| <i>TACR1</i>    | 2  | 75273590  | 75426645  |
| <i>TAT</i>      | 16 | 71600754  | 71610998  |
| <i>TBXAS1</i>   | 7  | 139478047 | 139720125 |
| <i>TCN1</i>     | 11 | 59620281  | 59634041  |
| <i>TEK</i>      | 9  | 27109139  | 27230176  |
| <i>TERT</i>     | 5  | 1253282   | 1295162   |
| <i>TF</i>       | 3  | 133380842 | 133497850 |
| <i>TFPI</i>     | 2  | 188328957 | 188419221 |
| <i>TGFB1</i>    | 19 | 41836436  | 41859838  |
| <i>TGFBR2</i>   | 3  | 30647985  | 30735634  |
| <i>TH</i>       | 11 | 2185159   | 2193367   |
| <i>THBD</i>     | 20 | 23026270  | 23030301  |
| <i>THRA</i>     | 17 | 38218446  | 38250120  |
| <i>THRB</i>     | 3  | 24158644  | 24536772  |
| <i>TLR9</i>     | 3  | 52255096  | 52260179  |
| <i>TNF</i>      | 6  | 31543344  | 31546113  |
| <i>TNFAIP6</i>  | 2  | 152214097 | 152237759 |
| <i>TNFSF11</i>  | 13 | 43136872  | 43182149  |
| <i>TNFSF13B</i> | 13 | 108921768 | 108960832 |
| <i>TOP1</i>     | 20 | 39657462  | 39753127  |
| <i>TOP2A</i>    | 17 | 38544773  | 38574202  |
| <i>TPMT</i>     | 6  | 18128542  | 18155396  |

|                 |    |           |           |
|-----------------|----|-----------|-----------|
| <i>TPO</i>      | 2  | 1417233   | 1546499   |
| <i>TRDMT1</i>   | 10 | 17179801  | 17244070  |
| <i>TRPA1</i>    | 8  | 72933486  | 73002244  |
| <i>TRPM8</i>    | 2  | 234826007 | 234928166 |
| <i>TRPV1</i>    | 17 | 3468740   | 3512705   |
| <i>TRPV3</i>    | 17 | 3413796   | 3461289   |
| <i>TSPO</i>     | 22 | 43547520  | 43559248  |
| <i>TUBA1A</i>   | 12 | 49578578  | 49583107  |
| <i>TUBA4A</i>   | 2  | 220114433 | 220119330 |
| <i>TUBB</i>     | 6  | 30687978  | 30693203  |
| <i>TUBB1</i>    | 20 | 57594309  | 57601709  |
| <i>TYMS</i>     | 18 | 657604    | 673499    |
| <i>TYR</i>      | 11 | 88911026  | 89028927  |
| <i>UCK2</i>     | 1  | 165796732 | 165880855 |
| <i>UGT1A9</i>   | 2  | 234580544 | 234681951 |
| <i>VCAM1</i>    | 1  | 101185196 | 101204601 |
| <i>VCAN</i>     | 5  | 82767493  | 82878122  |
| <i>VDR</i>      | 12 | 48235320  | 48298814  |
| <i>VEGFA</i>    | 6  | 43737946  | 43754224  |
| <i>VEGFB</i>    | 11 | 64002056  | 64006736  |
| <i>VKORC1</i>   | 16 | 31102175  | 31107658  |
| <i>VKORC1L1</i> | 7  | 65301323  | 65424550  |
| <i>VTN</i>      | 17 | 26694298  | 26697373  |
| <i>VWF</i>      | 12 | 6058040   | 6233836   |
| <i>XDH</i>      | 2  | 31557175  | 31637615  |
| <i>AOC1</i>     | 7  | 150523481 | 150558379 |
| <i>ASIC2</i>    | 17 | 31340105  | 32483825  |
| <i>ASIC1</i>    | 12 | 50451420  | 50477405  |
| <i>FECH</i>     | 18 | 55212073  | 55253969  |
| <i>GOT1</i>     | 10 | 101156627 | 101190530 |
| <i>MMP20</i>    | 11 | 102447566 | 102496063 |
| <i>TUBB4B</i>   | 9  | 140135711 | 140138159 |
| <i>CPQ</i>      | 8  | 97657455  | 98155731  |
| <i>P3H3</i>     | 12 | 6937538   | 6949018   |
| <i>PTGDR2</i>   | 11 | 60618398  | 60623444  |
| <i>DBNL</i>     | 7  | 44084239  | 44101315  |
| <i>P3H2</i>     | 3  | 189674517 | 189840226 |
| <i>KYAT3</i>    | 1  | 89401456  | 89458643  |
| <i>P3H1</i>     | 1  | 43212006  | 43232755  |
| <i>MMP25</i>    | 16 | 3095964   | 3110730   |
| <i>GADL1</i>    | 3  | 30767692  | 30936153  |
| <i>GLCCI1</i>   | 7  | 8008374   | 8128710   |

AZIN2

1 33546711 33644493

**Supplementary Table 3: All ICD-9 codes used in the study along with their descriptions and categories**

| <b>ICD-9_Code</b> | <b>ICD9_Description</b>                                                                 | <b>ICD9_Category</b>    |
|-------------------|-----------------------------------------------------------------------------------------|-------------------------|
| 110.1             | Dermatophytosis_of_nail                                                                 | Infectious_Diseases     |
| 110.4             | Dermatophytosis_of_foot                                                                 | Infectious_Diseases     |
| 110.5             | Dermatophytosis_of_the_body                                                             | Infectious_Diseases     |
| 112               | Candidiasis_of_mouth                                                                    | Infectious_Diseases     |
| 112.1             | Candidiasis_of_vulva_and_vagina                                                         | Infectious_Diseases     |
| 112.3             | Candidiasis_of_skin_and_nails                                                           | Infectious_Diseases     |
| 135               | Sarcoidosis                                                                             | Infectious_Diseases     |
| 153.9             | Malignant_neoplasm_of_colon,_unspecified_site                                           | Neoplasms               |
| 162.3             | Malignant_neoplasm_of_upper_lobe,_bronchus_or_lung                                      | Neoplasms               |
| 162.9             | Malignant_neoplasm_of_bronchus_and_lung,_unspecified                                    | Neoplasms               |
| 173.3             | Other_and_unspecified_malignant_neoplasm_of_skin_of_other_and_unspecified_parts_of_face | Neoplasms               |
| 174.4             | Malignant_neoplasm_of_upper-outer_quadrant_of_female_breast                             | Neoplasms               |
| 174.9             | Malignant_neoplasm_of_breast_(female),_unspecified                                      | Neoplasms               |
| 188.9             | Malignant_neoplasm_of_bladder,_part_unspecified                                         | Neoplasms               |
| 189               | Malignant_neoplasm_of_kidney,_except_pelvis                                             | Neoplasms               |
| 193               | Malignant_neoplasm_of_thyroid_gland                                                     | Neoplasms               |
| 202.8             | Other_malignant_lymphomas,_unspecified_site,_extranodal_and_solid_organ_sites           | Neoplasms               |
| 211.3             | Benign_neoplasm_of_colon                                                                | Neoplasms               |
| 216.9             | Benign_neoplasm_of_skin,_site_unspecified                                               | Neoplasms               |
| 227.3             | Benign_neoplasm_of_pituitary_gland_and_craniopharyngeal_duct                            | Neoplasms               |
| 238.2             | Neoplasm_of_uncertain_behavior_of_skin                                                  | Neoplasms               |
| 238.9             | Neoplasm_of_uncertain_behavior,_site_unspecified                                        | Neoplasms               |
| 240.9             | Goiter,_unspecified                                                                     | Endocrine_and_Metabolic |
| 241               | Nontoxic_uninodular_goiter                                                              | Endocrine_and_Metabolic |



|        |                                                                                                                                                   |                         |
|--------|---------------------------------------------------------------------------------------------------------------------------------------------------|-------------------------|
| 241.1  | Nontoxic_multinodular_goiter                                                                                                                      | Endocrine_and_Metabolic |
| 242    | Toxic_diffuse_goiter_without_mention_of_thyrotoxic_crisis_or_storm<br>Thyrotoxicosis_without_mention_of_goiter_or_other_cause,_and_without_mentio | Endocrine_and_Metabolic |
| 242.9  | n_of_thyrotoxic_crisis_or_storm                                                                                                                   | Endocrine_and_Metabolic |
| 244    | Postsurgical_hypothyroidism                                                                                                                       | Endocrine_and_Metabolic |
| 244.1  | Other_postablative_hypothyroidism                                                                                                                 | Endocrine_and_Metabolic |
| 244.8  | Other_specified_acquired_hypothyroidism                                                                                                           | Endocrine_and_Metabolic |
| 244.9  | Unspecified_acquired_hypothyroidism                                                                                                               | Endocrine_and_Metabolic |
| 245.2  | Chronic_lymphocytic_thyroiditis                                                                                                                   | Endocrine_and_Metabolic |
|        | Diabetes_mellitus_without_mention_of_complication,_type_II_or_unspecified_typ                                                                     |                         |
| 250    | e,_not_stated_as_uncontrolled                                                                                                                     | Endocrine_and_Metabolic |
|        | Diabetes_mellitus_without_mention_of_complication,_type_I_[juvenile_type],_not                                                                    |                         |
| 250.01 | _stated_as_uncontrolled                                                                                                                           | Endocrine_and_Metabolic |
|        | Diabetes_with_renal_manifestations,_type_II_or_unspecified_type,_not_stated_as                                                                    |                         |
| 250.4  | _uncontrolled                                                                                                                                     | Endocrine_and_Metabolic |
|        | Diabetes_with_ophthalmic_manifestations,_type_II_or_unspecified_type,_not_stat                                                                    |                         |
| 250.5  | ed_as_uncontrolled                                                                                                                                | Endocrine_and_Metabolic |
|        | Diabetes_with_neurological_manifestations,_type_II_or_unspecified_type,_not_sta                                                                   |                         |
| 250.6  | ted_as_uncontrolled                                                                                                                               | Endocrine_and_Metabolic |
|        | Diabetes_with_peripheral_circulatory_disorders,_type_II_or_unspecified_type,_not                                                                  |                         |
| 250.7  | _stated_as_uncontrolled                                                                                                                           | Endocrine_and_Metabolic |
|        | Diabetes_with_other_specified_manifestations,_type_II_or_unspecified_type,_not                                                                    |                         |
| 250.8  | _stated_as_uncontrolled                                                                                                                           | Endocrine_and_Metabolic |
| 251.1  | Other_specified_hypoglycemia                                                                                                                      | Endocrine_and_Metabolic |
| 251.2  | Hypoglycemia,_unspecified                                                                                                                         | Endocrine_and_Metabolic |
| 252.01 | Primary_hyperparathyroidism                                                                                                                       | Endocrine_and_Metabolic |
| 266.2  | Other_B-complex_deficiencies                                                                                                                      | Endocrine_and_Metabolic |
| 268.9  | Unspecified_vitamin_D_deficiency                                                                                                                  | Endocrine_and_Metabolic |
| 269.2  | Unspecified_vitamin_deficiency                                                                                                                    | Endocrine_and_Metabolic |

|                                                                |                         |
|----------------------------------------------------------------|-------------------------|
| 272 Pure_hypercholesterolemia                                  | Endocrine_and_Metabolic |
| 272.1 Pure_hyperglyceridemia                                   | Endocrine_and_Metabolic |
| 272.2 Mixed_hyperlipidemia                                     | Endocrine_and_Metabolic |
| 272.4 Other_and_unspecified_hyperlipidemia                     | Endocrine_and_Metabolic |
| 272.5 Lipoprotein_deficiencies                                 | Endocrine_and_Metabolic |
| 273.1 Monoclonal_paraproteinemia                               | Endocrine_and_Metabolic |
| 274 Gouty_arthropathy                                          | Endocrine_and_Metabolic |
| 274 Gouty_arthropathy,_unspecified                             | Endocrine_and_Metabolic |
| 274.9 Gout,_unspecified                                        | Endocrine_and_Metabolic |
| 275.42 Hypercalcemia                                           | Endocrine_and_Metabolic |
| 276.1 Hyposmolality_and/or_hyponatremia                        | Endocrine_and_Metabolic |
| 276.51 Dehydration                                             | Endocrine_and_Metabolic |
| 276.6 Fluid_overload                                           | Endocrine_and_Metabolic |
| 276.7 Hyperpotassemia                                          | Endocrine_and_Metabolic |
| 276.8 Hypopotassemia                                           | Endocrine_and_Metabolic |
| 276.9 Electrolyte_and_fluid_disorders_not_elsewhere_classified | Endocrine_and_Metabolic |
| 277.7 Dysmetabolic_syndrome_X                                  | Endocrine_and_Metabolic |
| 278 Obesity,_unspecified                                       | Endocrine_and_Metabolic |
| 278.01 Morbid_obesity                                          | Endocrine_and_Metabolic |
| 278.02 Overweight                                              | Endocrine_and_Metabolic |
| 278.1 Localized_adiposity                                      | Endocrine_and_Metabolic |
| 280.9 Iron_deficiency_anemia,_unspecified                      | Blood_Disorder          |
| 281 Pernicious_anemia                                          | Blood_Disorder          |
| 281.1 Other_vitamin_B12_deficiency_anemia                      | Blood_Disorder          |
| 285.1 Acute_posthemorrhagic_anemia                             | Blood_Disorder          |
| 285.21 Anemia_in_chronic_kidney_disease                        | Blood_Disorder          |
| 285.9 Anemia,_unspecified                                      | Blood_Disorder          |
| 287.5 Thrombocytopenia,_unspecified                            | Blood_Disorder          |
| 289.81 Primary_hypercoagulable_state                           | Blood_Disorder          |

|        |                                                                     |                  |
|--------|---------------------------------------------------------------------|------------------|
| 296.2  | Major_depressive_affective_disorder,_single_episode,_unspecified    | Mental_Disorders |
| 296.22 | Major_depressive_affective_disorder,_single_episode,_moderate       | Mental_Disorders |
| 296.3  | Major_depressive_affective_disorder,_recurrent_episode,_unspecified | Mental_Disorders |
| 296.32 | Major_depressive_affective_disorder,_recurrent_episode,_moderate    | Mental_Disorders |
| 296.8  | Bipolar_disorder,_unspecified                                       | Mental_Disorders |
| 296.9  | Unspecified_episodic_mood_disorder                                  | Mental_Disorders |
| 300    | Anxiety_state,_unspecified                                          | Mental_Disorders |
| 300.01 | Panic_disorder_without_agoraphobia                                  | Mental_Disorders |
| 300.02 | Generalized_anxiety_disorder                                        | Mental_Disorders |
| 300.09 | Other_anxiety_states                                                | Mental_Disorders |
| 300.4  | Dysthymic_disorder                                                  | Mental_Disorders |
| 305    | Alcohol_abuse,_unspecified                                          | Mental_Disorders |
| 305.1  | Tobacco_use_disorder                                                | Mental_Disorders |
| 307.42 | Persistent_disorder_of_initiating_or_maintaining_sleep              | Mental_Disorders |
| 307.5  | Eating_disorder,_unspecified                                        | Mental_Disorders |
| 307.81 | Tension_headache                                                    | Mental_Disorders |
| 309    | Adjustment_disorder_with_depressed_mood                             | Mental_Disorders |
| 309.24 | Adjustment_disorder_with_anxiety                                    | Mental_Disorders |
| 309.28 | Adjustment_disorder_with_mixed_anxiety_and_depressed_mood           | Mental_Disorders |
| 311    | Depressive_disorder,_not_elsewhere_classified                       | Mental_Disorders |
| 314    | Attention_deficit_disorder_without_mention_of_hyperactivity         | Mental_Disorders |
| 314.01 | Attention_deficit_disorder_with_hyperactivity                       | Mental_Disorders |
| 327.23 | Obstructive_sleep_apnea_(adult)(pediatric)                          | Nervous_System   |
| 327.8  | Other_organic_sleep_disorders                                       | Nervous_System   |
| 332    | Paralysis_agitans                                                   | Nervous_System   |
| 333.1  | Essential_and_other_specified_forms_of_tremor                       | Nervous_System   |
| 333.94 | Restless_legs_syndrome_(RLS)                                        | Nervous_System   |
| 338.29 | Other_chronic_pain                                                  | Nervous_System   |
| 338.4  | Chronic_pain_syndrome                                               | Nervous_System   |

|        |                                                                                |                |
|--------|--------------------------------------------------------------------------------|----------------|
| 340    | Multiple_sclerosis                                                             | Nervous_System |
| 345.1  | Generalized_convulsive_epilepsy,_without_mention_of_intractable_epilepsy       | Nervous_System |
| 345.9  | Epilepsy,_unspecified,_without_mention_of_intractable_epilepsy                 | Nervous_System |
|        | Migraine_with_aura,_without_mention_of_intractable_migraine_without_mention    |                |
| 346    | _of_status_migrainosus                                                         | Nervous_System |
|        | Migraine_with_aura,_with_intractable_migraine,_so_stated,_without_mention_of_  |                |
| 346.01 | status_migrainosus                                                             | Nervous_System |
|        | Migraine_without_aura,_without_mention_of_intractable_migraine_without_ment    |                |
| 346.1  | ion_of_status_migrainosus                                                      | Nervous_System |
|        | Migraine_without_aura,_with_intractable_migraine,_so_stated,_without_mention   |                |
| 346.11 | _of_status_migrainosus                                                         | Nervous_System |
|        | Variants_of_migraine,_not_elsewhere_classified,_without_mention_of_intractable |                |
| 346.2  | _migraine_without_mention_of_status_migrainosus                                | Nervous_System |
|        | Migraine,_unspecified,_without_mention_of_intractable_migraine_without_menti   |                |
| 346.9  | on_of_status_migrainosus                                                       | Nervous_System |
| 354    | Carpal_tunnel_syndrome                                                         | Nervous_System |
| 354.2  | Lesion_of_ulnar_nerve                                                          | Nervous_System |
| 355.9  | Mononeuritis_of_unspecified_site                                               | Nervous_System |
| 356.9  | Unspecified_hereditary_and_idiopathic_peripheral_neuropathy                    | Nervous_System |
| 357.2  | Polyneuropathy_in_diabetes                                                     | Nervous_System |
| 357.4  | Polyneuropathy_in_other_diseases_classified_elsewhere                          | Nervous_System |
| 361    | Retinal_detachment_with_retinal_defect,_unspecified                            | Nervous_System |
| 362.01 | Background_diabetic_retinopathy                                                | Nervous_System |
| 362.02 | Proliferative_diabetic_retinopathy                                             | Nervous_System |
| 362.07 | Diabetic_macular_edema                                                         | Nervous_System |
| 362.5  | Macular_degeneration_(senile),_unspecified                                     | Nervous_System |
| 362.51 | Nonexudative_senile_macular_degeneration                                       | Nervous_System |
| 362.52 | Exudative_senile_macular_degeneration                                          | Nervous_System |
| 362.56 | Macular_puckering                                                              | Nervous_System |

|                                                               |                |
|---------------------------------------------------------------|----------------|
| 362.83 Retinal_edema                                          | Nervous_System |
| 364.3 Unspecified_iridocyclitis                               | Nervous_System |
| 365 Prolapsed_lens,_unspecified                               | Nervous_System |
| 365.02 Anatomical_narrow_angle_borderline_glaucoma            | Nervous_System |
| 365.04 Ocular_hypertension                                    | Nervous_System |
| 365.11 Primary_open_angle_glaucoma                            | Nervous_System |
| 365.2 Primary_angle-closure_glaucoma,_unspecified             | Nervous_System |
| 365.7 Glaucoma_stage,_unspecified                             | Nervous_System |
| 365.9 Unspecified_glaucoma                                    | Nervous_System |
| 366.1 Senile_cataract,_unspecified                            | Nervous_System |
| 366.12 Incipient_senile_cataract                              | Nervous_System |
| 366.14 Posterior_subcapsular_polar_senile_cataract            | Nervous_System |
| 366.15 Cortical_senile_cataract                               | Nervous_System |
| 366.16 Senile_nuclear_sclerosis                               | Nervous_System |
| 366.52 Other_after-cataract,_not_obscuring_vision             | Nervous_System |
| 366.53 After-cataract,_obscuring_vision                       | Nervous_System |
| 366.9 Unspecified_cataract                                    | Nervous_System |
| 367.4 Presbyopia                                              | Nervous_System |
| 367.9 Unspecified_disorder_of_refraction_and_accommodation    | Nervous_System |
| 368.2 Diplopia                                                | Nervous_System |
| 370.33 Keratoconjunctivitis_sicca,_not_specified_as_Sjogren's | Nervous_System |
| 371.52 Other_anterior_corneal_dystrophies                     | Nervous_System |
| 371.57 Endothelial_corneal_dystrophy                          | Nervous_System |
| 372.14 Other_chronic_allergic_conjunctivitis                  | Nervous_System |
| 372.3 Conjunctivitis,_unspecified                             | Nervous_System |
| 373 Blepharitis,_unspecified                                  | Nervous_System |
| 374.3 Ptosis_of_eyelid,_unspecified                           | Nervous_System |
| 374.87 Dermatochalasis                                        | Nervous_System |
| 375.15 Tear_film_insufficiency,_unspecified                   | Nervous_System |

|                                                                                    |                     |
|------------------------------------------------------------------------------------|---------------------|
| 379.21 Vitreous_degeneration                                                       | Nervous_System      |
| 379.23 Vitreous_hemorrhage                                                         | Nervous_System      |
| 38.9 Unspecified_septicemia                                                        | Infectious_Diseases |
| 380.1 Infective_otitis externa,_unspecified                                        | Nervous_System      |
| 380.22 Other_acute_otitis externa                                                  | Nervous_System      |
| 380.4 Impacted_cerumen                                                             | Nervous_System      |
| 381.01 Acute_serous_otitis media                                                   | Nervous_System      |
| 381.81 Dysfunction_of_Eustachian_tube                                              | Nervous_System      |
| 382.9 Unspecified_otitis media                                                     | Nervous_System      |
| 386.11 Benign_paroxysmal_positional_vertigo                                        | Nervous_System      |
| 388.7 Otalgia,_unspecified                                                         | Nervous_System      |
| 389.1 Sensorineural_hearing_loss,_unspecified                                      | Nervous_System      |
| 389.9 Unspecified_hearing_loss                                                     | Nervous_System      |
| 397 Diseases_of_tricuspid_valve                                                    | Circulatory         |
| 401.9 Unspecified_essential_hypertension                                           | Circulatory         |
| 402.9 Unspecified_hypertensive_heart_disease_without_heart_failure                 | Circulatory         |
| 402.91 Unspecified_hypertensive_heart_disease_with_heart_failure                   | Circulatory         |
| Hypertensive_chronic_kidney_disease,_unspecified,_with_chronic_kidney_disease_     |                     |
| 403.9 stage_I_through_stage_IV,_or_unspecified                                     | Circulatory         |
| Hypertensive_chronic_kidney_disease,_unspecified,_with_chronic_kidney_disease_     |                     |
| 403.91 stage_V_or_end_stage_renal_disease                                          | Circulatory         |
| 410.7 Subendocardial_infarction,_episode_of_care_unspecified                       | Circulatory         |
| 410.9 Acute_myocardial_infarction_of_unspecified_site,_episode_of_care_unspecified | Circulatory         |
| 411.1 Intermediate_coronary_syndrome                                               | Circulatory         |
| 412 Old_myocardial_infarction                                                      | Circulatory         |
| 413.9 Other_and_unspecified_angina_pectoris                                        | Circulatory         |
| 414 Coronary_atherosclerosis_of_unspecified_type_of_vessel,_native_or_graft        | Circulatory         |
| 414.01 Coronary_atherosclerosis_of_native_coronary_artery                          | Circulatory         |
| 414.8 Other_specified_forms_of_chronic_ischemic_heart_disease                      | Circulatory         |

|                                                                                |             |
|--------------------------------------------------------------------------------|-------------|
| 414.9 Chronic_ischemic_heart_disease,_unspecified                              | Circulatory |
| 415.19 Other_pulmonary_embolism_and_infarction                                 | Circulatory |
| 416.8 Other_chronic_pulmonary_heart_diseases                                   | Circulatory |
| 424 Mitral_valve_disorders                                                     | Circulatory |
| 424.1 Aortic_valve_disorders                                                   | Circulatory |
| 424.9 Endocarditis,_valve_unspecified,_unspecified_cause                       | Circulatory |
| 425.4 Other_primary_cardiomyopathies                                           | Circulatory |
| 426 Atrioventricular_block,_complete                                           | Circulatory |
| 426.3 Other_left_bundle_branch_block                                           | Circulatory |
| 427 Paroxysmal_supraventricular_tachycardia                                    | Circulatory |
| 427.1 Paroxysmal_ventricular_tachycardia                                       | Circulatory |
| 427.31 Atrial_fibrillation                                                     | Circulatory |
| 427.32 Atrial_flutter                                                          | Circulatory |
| 427.69 Other_premature_beats                                                   | Circulatory |
| 427.81 Sinoatrial_node_dysfunction                                             | Circulatory |
| 427.89 Other_specified_cardiac_dysrhythmias                                    | Circulatory |
| 428 Congestive_heart_failure,_unspecified                                      | Circulatory |
| 428.2 Systolic_heart_failure,_unspecified                                      | Circulatory |
| 428.22 Chronic_systolic_heart_failure                                          | Circulatory |
| 428.23 Acute_on_chronic_systolic_heart_failure                                 | Circulatory |
| 428.3 Diastolic_heart_failure,_unspecified                                     | Circulatory |
| 428.32 Chronic_diastolic_heart_failure                                         | Circulatory |
| 428.33 Acute_on_chronic_diastolic_heart_failure                                | Circulatory |
| 428.9 Heart_failure,_unspecified                                               | Circulatory |
| 429.2 Cardiovascular_disease,_unspecified                                      | Circulatory |
| 429.9 Heart_disease,_unspecified                                               | Circulatory |
| Occlusion_and_stenosis_of_carotid_artery_without_mention_of_cerebral_infarctio |             |
| 433.1 n                                                                        | Circulatory |
| 433.11 Occlusion_and_stenosis_of_carotid_artery_with_cerebral_infarction       | Circulatory |

|                                                                                  |             |
|----------------------------------------------------------------------------------|-------------|
| 434.91 Cerebral_artery_occlusion,_unspecified_with_cerebral_infarction           | Circulatory |
| 435.9 Unspecified_transient_cerebral_ischemia                                    | Circulatory |
| 436 Acute,_but_ill-defined,_cerebrovascular_disease                              | Circulatory |
| 437 Cerebral_atherosclerosis                                                     | Circulatory |
| 437.3 Cerebral_aneurysm,_nonruptured                                             | Circulatory |
| 440.1 Atherosclerosis_of_renal_artery                                            | Circulatory |
| 440.2 Atherosclerosis_of_native_arteries_of_the_extremities,_unspecified         | Circulatory |
| Atherosclerosis_of_native_arteries_of_the_extremities_with_intermittent_claudica |             |
| 440.21 tion                                                                      | Circulatory |
| 440.23 Atherosclerosis_of_native_arteries_of_the_extremities_with_ulceration     | Circulatory |
| 440.9 Generalized_and_unspecified_atherosclerosis                                | Circulatory |
| 441.2 Thoracic_aneurysm_without_mention_of_rupture                               | Circulatory |
| 441.4 Abdominal_aneurysm_without_mention_of_rupture                              | Circulatory |
| 443 Raynaud's_syndrome                                                           | Circulatory |
| 443.81 Peripheral_angiopathy_in_diseases_classified_elsewhere                    | Circulatory |
| 443.9 Peripheral_vascular_disease,_unspecified                                   | Circulatory |
| 451.19 Phlebitis_and_thrombophlebitis_of_deep_veins_of_lower_extremities,_other  | Circulatory |
| Acute_venous_embolism_and_thrombosis_of_unspecified_deep_vessels_of_lower        |             |
| 453.4 _extremity                                                                 | Circulatory |
| 453.9 Other_venous_embolism_and_thrombosis_of_unspecified_site                   | Circulatory |
| 454 Varicose_veins_of_lower_extremities_with_ulcer                               | Circulatory |
| 454.8 Varicose_veins_of_lower_extremities_with_other_complications               | Circulatory |
| 454.9 Asymptomatic_varicose_veins                                                | Circulatory |
| 455.3 External_hemorrhoids_without_mention_of_complication                       | Circulatory |
| 455.6 Unspecified_hemorrhoids_without_mention_of_complication                    | Circulatory |
| 458 Orthostatic_hypotension                                                      | Circulatory |
| 458.9 Hypotension,_unspecified                                                   | Circulatory |
| 459.81 Venous_(peripheral)_insufficiency,_unspecified                            | Circulatory |
| 461 Acute_maxillary_sinusitis                                                    | Respiratory |



|                                                                       |             |
|-----------------------------------------------------------------------|-------------|
| 461.9 Acute_sinusitis,_unspecified                                    | Respiratory |
| 462 Acute_pharyngitis                                                 | Respiratory |
| 465.9 Acute_upper_respiratory_infections_of_unspecified_site          | Respiratory |
| 466 Acute_bronchitis                                                  | Respiratory |
| 470 Deviated_nasal_septum                                             | Respiratory |
| 472 Chronic_rhinitis                                                  | Respiratory |
| 473.8 Other_chronic_sinusitis                                         | Respiratory |
| 473.9 Unspecified_sinusitis_(chronic)                                 | Respiratory |
| 477.8 Allergic_rhinitis_due_to_other_allergen                         | Respiratory |
| 477.9 Allergic_rhinitis,_cause_unspecified                            | Respiratory |
| 482.9 Bacterial_pneumonia,_unspecified                                | Respiratory |
| 486 Pneumonia,_organism_unspecified                                   | Respiratory |
| 490 Bronchitis,_not_specified_as_acute_or_chronic                     | Respiratory |
| 491.21 Obstructive_chronic_bronchitis_with_(acute)_exacerbation       | Respiratory |
| 492.8 Other_emphysema                                                 | Respiratory |
| 493.2 Chronic_obstructive_asthma,_unspecified                         | Respiratory |
| 493.9 Asthma,_unspecified_type,_unspecified                           | Respiratory |
| 493.92 Asthma,_unspecified_type,_with_(acute)_exacerbation            | Respiratory |
| 496 Chronic_airway_obstruction,_not_elsewhere_classified              | Respiratory |
| 511.9 Unspecified_pleural_effusion                                    | Respiratory |
| 515 Postinflammatory_pulmonary_fibrosis                               | Respiratory |
| 518.89 Other_diseases_of_lung,_not_elsewhere_classified               | Respiratory |
| 520.6 Disturbances_in_tooth_eruption                                  | Digestive   |
| 521 Dental_caries                                                     | Digestive   |
| 521 Dental_caries,_unspecified                                        | Digestive   |
| 521.02 Dental_caries_extending_into_dentine                           | Digestive   |
| 522.5 Periapical_abscess_without_sinus                                | Digestive   |
| 524.6 Temporomandibular_joint_disorders,_unspecified                  | Digestive   |
| 525.1 Loss_of_teeth_due_to_trauma,_extraction,_or_periodontal_disease | Digestive   |

|                                                                                 |                     |
|---------------------------------------------------------------------------------|---------------------|
| 53.9 Herpes_zoster_without_mention_of_complication                              | Infectious_Diseases |
| 530.1 Esophagitis,_unspecified                                                  | Digestive           |
| 530.11 Reflux_esophagitis                                                       | Digestive           |
| 530.81 Esophageal_reflux                                                        | Digestive           |
| 530.85 Barrett's_esophagus                                                      | Digestive           |
| Peptic_ulcer_of_unspecified_site,_unspecified_as_acute_or_chronic,_without_men  |                     |
| 533.9 tion_of_hemorrhage_or_perforation,_without_mention_of_obstruction         | Digestive           |
| 535.5 Unspecified_gastritis_and_gastroduodenitis,_without_mention_of_hemorrhage | Digestive           |
| 536.3 Gastroparesis                                                             | Digestive           |
| 54.9 Herpes_simplex_without_mention_of_complication                             | Infectious_Diseases |
| Inguinal_hernia,_without_mention_of_obstruction_or_gangrene,_unilateral_or_un   |                     |
| 550.9 specified_(not_specified_as_recurrent)                                    | Digestive           |
| 553.1 Umbilical_hernia_without_mention_of_obstruction_or_gangrene               | Digestive           |
| 553.2 Ventral,_unspecified,_hernia_without_mention_of_obstruction_or_gangrene   | Digestive           |
| 553.21 Incisional_hernia_without_mention_of_obstruction_or_gangrene             | Digestive           |
| 553.3 Diaphragmatic_hernia_without_mention_of_obstruction_or_gangrene           | Digestive           |
| 555.9 Regional_enteritis_of_unspecified_site                                    | Digestive           |
| 556.9 Ulcerative_colitis,_unspecified                                           | Digestive           |
| 560.9 Unspecified_intestinal_obstruction                                        | Digestive           |
| 562.1 Diverticulosis_of_colon_(without_mention_of_hemorrhage)                   | Digestive           |
| 562.11 Diverticulitis_of_colon_(without_mention_of_hemorrhage)                  | Digestive           |
| 564 Constipation,_unspecified                                                   | Digestive           |
| 564.09 Other_constipation                                                       | Digestive           |
| 564.1 Irritable_bowel_syndrome                                                  | Digestive           |
| 564.2 Postgastric_surgery_syndromes                                             | Digestive           |
| 569.3 Hemorrhage_of_rectum_and_anus                                             | Digestive           |
| 571.5 Cirrhosis_of_liver_without_mention_of_alcohol                             | Digestive           |
| 571.8 Other_chronic_nonalcoholic_liver_disease                                  | Digestive           |

|                                                                                |               |
|--------------------------------------------------------------------------------|---------------|
| Calculus_of_gallbladder_without_mention_of_cholecystitis,_without_mention_of_  |               |
| 574.2 obstruction                                                              | Digestive     |
| 577 Acute_pancreatitis                                                         | Digestive     |
| 578.9 Hemorrhage_of_gastrointestinal_tract,_unspecified                        | Digestive     |
| 579.3 Other_and_unspecified_postsurgical_nonabsorption                         | Digestive     |
| Nephritis_and_nephropathy,_not_specified_as_acute_or_chronic,_in_diseases_clas |               |
| 583.81 sified_elsewhere                                                        | Genitourinary |
| 584.9 Acute_kidney_failure,_unspecified                                        | Genitourinary |
| 585.3 Chronic_kidney_disease,_Stage_III_(moderate)                             | Genitourinary |
| 585.4 Chronic_kidney_disease,_Stage_IV_(severe)                                | Genitourinary |
| 585.5 Chronic_kidney_disease,_Stage_V                                          | Genitourinary |
| 585.6 End_stage_renal_disease                                                  | Genitourinary |
| 585.9 Chronic_kidney_disease,_unspecified                                      | Genitourinary |
| 586 Renal_failure,_unspecified                                                 | Genitourinary |
| 591 Hydronephrosis                                                             | Genitourinary |
| 592 Calculus_of_kidney                                                         | Genitourinary |
| 592.1 Calculus_of_ureter                                                       | Genitourinary |
| 593.2 Cyst_of_kidney,_acquired                                                 | Genitourinary |
| 593.9 Unspecified_disorder_of_kidney_and_ureter                                | Genitourinary |
| 595 Acute_cystitis                                                             | Genitourinary |
| 596.54 Neurogenic_bladder_NOS                                                  | Genitourinary |
| 599 Urinary_tract_infection,_site_not_specified                                | Genitourinary |
| 599.7 Hematuria                                                                | Genitourinary |
| 599.7 Hematuria,_unspecified                                                   | Genitourinary |
| 599.71 Gross_hematuria                                                         | Genitourinary |
| 607.84 Impotence_of_organic_origin                                             | Genitourinary |
| 611.1 Hypertrophy_of_breast                                                    | Genitourinary |
| 611.72 Lump_or_mass_in_breast                                                  | Genitourinary |
| 618.01 Cystocele,_midline                                                      | Genitourinary |

|                                                                                   |                     |
|-----------------------------------------------------------------------------------|---------------------|
| 625.9 Unspecified_symptom_associated_with_female_genital_organs                   | Genitourinary       |
| 627.2 Symptomatic_menopausal_or_female_climacteric_states                         | Genitourinary       |
| 648.83 Abnormal_glucose_tolerance_of_mother,_antepartum_condition_or_complication | Pregnancy_related   |
| 682.2 Cellulitis_and_abscess_of_trunk                                             | Skin                |
| 682.6 Cellulitis_and_abscess_of_leg,_except_foot                                  | Skin                |
| 682.7 Cellulitis_and_abscess_of_foot,_except_toes                                 | Skin                |
| 682.9 Cellulitis_and_abscess_of_unspecified_sites                                 | Skin                |
| 690.1 Seborrheic_dermatitis,_unspecified                                          | Skin                |
| 692.6 Contact_dermatitis_and_other_eczema_due_to_plants_[except_food]             | Skin                |
| 692.9 Contact_dermatitis_and_other_eczema,_unspecified_cause                      | Skin                |
| 695.3 Rosacea                                                                     | Skin                |
| 695.89 Other_specified_erythematous_conditions                                    | Skin                |
| 696 Psoriatic_arthropathy                                                         | Skin                |
| 696.1 Other_psoriasis                                                             | Skin                |
| 698.9 Unspecified_pruritic_disorder                                               | Skin                |
| 70.54 Chronic_hepatitis_C_without_mention_of_hepatic_coma                         | Infectious_Diseases |
| 700 Corns_and_callosities                                                         | Skin                |
| 701.9 Unspecified_hypertrophic_and_atrophic_conditions_of_skin                    | Skin                |
| 702 Actinic_keratosis                                                             | Skin                |
| 702.11 Inflamed_seborrheic_keratosis                                              | Skin                |
| 702.19 Other_seborrheic_keratosis                                                 | Skin                |
| 703 Ingrowing_nail                                                                | Skin                |
| 703.8 Other_specified_diseases_of_nail                                            | Skin                |
| 704.1 Hirsutism                                                                   | Skin                |
| 704.8 Other_specified_diseases_of_hair_and_hair_follicles                         | Skin                |
| 706.1 Other_acne                                                                  | Skin                |
| 706.2 Sebaceous_cyst                                                              | Skin                |
| 707.1 Ulcer_of_lower_limb,_unspecified                                            | Skin                |
| 707.14 Ulcer_of_heel_and_midfoot                                                  | Skin                |

|                                                                                      |                 |
|--------------------------------------------------------------------------------------|-----------------|
| 707.15 Ulcer_of_other_part_of_foot                                                   | Skin            |
| 707.9 Chronic_ulcer_of_unspecified_site                                              | Skin            |
| 708.9 Urticaria,_unspecified                                                         | Skin            |
| 709.2 Scar_conditions_and_fibrosis_of_skin                                           | Skin            |
| 709.9 Unspecified_disorder_of_skin_and_subcutaneous_tissue                           | Skin            |
| 710 Systemic_lupus_erythematosus                                                     | Musculoskeletal |
| 710.2 Sicca_syndrome                                                                 | Musculoskeletal |
| 714 Rheumatoid_arthritis                                                             | Musculoskeletal |
| 715 Osteoarthritis,_generalized,_site_unspecified                                    | Musculoskeletal |
| 715.09 Osteoarthritis,_generalized,_multiple_sites                                   | Musculoskeletal |
| 715.16 Osteoarthritis,_localized,_primary,_lower_leg                                 | Musculoskeletal |
| 715.34 Osteoarthritis,_localized,_not_specified_whether_primary_or_secondary,_hand   | Musculoskeletal |
| 715.9 Osteoarthritis,_unspecified_whether_generalized_or_localized,_site_unspecified | Musculoskeletal |
| 715.91 Osteoarthritis,_unspecified_whether_generalized_or_localized,_shoulder_region | Musculoskeletal |
| 715.94 Osteoarthritis,_unspecified_whether_generalized_or_localized,_hand            | Musculoskeletal |
| Osteoarthritis,_unspecified_whether_generalized_or_localized,_pelvic_region_and      |                 |
| 715.95 _thigh                                                                        | Musculoskeletal |
| 715.96 Osteoarthritis,_unspecified_whether_generalized_or_localized,_lower_leg       | Musculoskeletal |
| Osteoarthritis,_unspecified_whether_generalized_or_localized,_other_specified_si     |                 |
| 715.98 tes                                                                           | Musculoskeletal |
| 716.59 Unspecified_polyarthropathy_or_polyarthritis,_multiple_sites                  | Musculoskeletal |
| 716.96 Arthropathy,_unspecified,_lower_leg                                           | Musculoskeletal |
| 717.9 Unspecified_internal_derangement_of_knee                                       | Musculoskeletal |
| 719.41 Pain_in_joint,_shoulder_region                                                | Musculoskeletal |
| 719.43 Pain_in_joint,_forearm                                                        | Musculoskeletal |
| 719.44 Pain_in_joint,_hand                                                           | Musculoskeletal |
| 719.45 Pain_in_joint,_pelvic_region_and_thigh                                        | Musculoskeletal |
| 719.46 Pain_in_joint,_lower_leg                                                      | Musculoskeletal |
| 719.47 Pain_in_joint,_ankle_and_foot                                                 | Musculoskeletal |

|                                                                        |                 |
|------------------------------------------------------------------------|-----------------|
| 719.49 Pain_in_joint,_multiple_sites                                   | Musculoskeletal |
| 719.7 Difficulty_in_walking                                            | Musculoskeletal |
| 720.2 Sacroiliitis,_not_elsewhere_classified                           | Musculoskeletal |
| 721 Cervical_spondylosis_without_myelopathy                            | Musculoskeletal |
| 721.3 Lumbosacral_spondylosis_without_myelopathy                       | Musculoskeletal |
| 722 Displacement_of_cervical_intervertebral_disc_without_myelopathy    | Musculoskeletal |
| 722.1 Displacement_of_lumbar_intervertebral_disc_without_myelopathy    | Musculoskeletal |
| 722.4 Degeneration_of_cervical_intervertebral_disc                     | Musculoskeletal |
| 722.52 Degeneration_of_lumbar_or_lumbosacral_intervertebral_disc       | Musculoskeletal |
| 722.6 Degeneration_of_intervertebral_disc,_site_unspecified            | Musculoskeletal |
| 722.83 Postlaminectomy_syndrome,_lumbar_region                         | Musculoskeletal |
| 722.9 Other_and_unspecified_disc_disorder,_unspecified_region          | Musculoskeletal |
| 722.91 Other_and_unspecified_disc_disorder,_cervical_region            | Musculoskeletal |
| 722.93 Other_and_unspecified_disc_disorder,_lumbar_region              | Musculoskeletal |
| 723 Spinal_stenosis_in_cervical_region                                 | Musculoskeletal |
| 723.1 Cervicalgia                                                      | Musculoskeletal |
| 723.4 Brachial_neuritis_or_radiculitis_NOS                             | Musculoskeletal |
| 723.8 Other_syndromes_affecting_cervical_region                        | Musculoskeletal |
| 724 Spinal_stenosis,_unspecified_region                                | Musculoskeletal |
| 724.02 Spinal_stenosis,_lumbar_region,_without_neurogenic_claudication | Musculoskeletal |
| 724.1 Pain_in_thoracic_spine                                           | Musculoskeletal |
| 724.2 Lumbago                                                          | Musculoskeletal |
| 724.3 Sciatica                                                         | Musculoskeletal |
| 724.4 Thoracic_or_lumbosacral_neuritis_or_radiculitis,_unspecified     | Musculoskeletal |
| 724.5 Backache,_unspecified                                            | Musculoskeletal |
| 725 Polymyalgia_rheumatica                                             | Musculoskeletal |
| 726 Adhesive_capsulitis_of_shoulder                                    | Musculoskeletal |
| 726.1 Disorders_of_bursae_and_tendons_in_shoulder_region,_unspecified  | Musculoskeletal |
| 726.2 Other_affectations_of_shoulder_region,_not_elsewhere_classified  | Musculoskeletal |

|                                                         |                      |
|---------------------------------------------------------|----------------------|
| 726.32 Lateral_epicondylitis                            | Musculoskeletal      |
| 726.33 Olecranon_bursitis                               | Musculoskeletal      |
| 726.5 Enthesopathy_of_hip_region                        | Musculoskeletal      |
| 726.6 Enthesopathy_of_knee,_unspecified                 | Musculoskeletal      |
| 726.71 Achilles_bursitis_or_tendinitis                  | Musculoskeletal      |
| 727.03 Trigger_finger_(acquired)                        | Musculoskeletal      |
| 727.05 Other_tenosynovitis_of_hand_and_wrist            | Musculoskeletal      |
| 727.1 Bunion                                            | Musculoskeletal      |
| 728.71 Plantar_fascial_fibromatosis                     | Musculoskeletal      |
| 728.85 Spasm_of_muscle                                  | Musculoskeletal      |
| 729.1 Myalgia_and_myositis,_unspecified                 | Musculoskeletal      |
| 729.2 Neuralgia,_neuritis,_and_radiculitis,_unspecified | Musculoskeletal      |
| 729.3 Panniculitis,_unspecified_site                    | Musculoskeletal      |
| 729.5 Pain_in_limb                                      | Musculoskeletal      |
| 729.82 Cramp_of_limb                                    | Musculoskeletal      |
| 733 Osteoporosis,_unspecified                           | Musculoskeletal      |
| 733.01 Senile_osteoporosis                              | Musculoskeletal      |
| 733.09 Other_osteoporosis                               | Musculoskeletal      |
| 733.13 Pathologic_fracture_of_vertebrae                 | Musculoskeletal      |
| 733.9 Disorder_of_bone_and_cartilage,_unspecified       | Musculoskeletal      |
| 737.3 Scoliosis_[and_kyphoscoliosis],_idiopathic        | Musculoskeletal      |
| 739.1 Nonallopathic_lesions,_cervical_region            | Musculoskeletal      |
| 739.2 Nonallopathic_lesions,_thoracic_region            | Musculoskeletal      |
| 739.3 Nonallopathic_lesions,_lumbar_region              | Musculoskeletal      |
| 745.5 Ostium_secundum_type_atrial_septal_defect         | Congenital_Anomalies |
| 756.12 Spondylolisthesis                                | Congenital_Anomalies |
| 78.1 Viral_warts,_unspecified                           | Infectious_Diseases  |
| 78.19 Other_specified_viral_warts                       | Infectious_Diseases  |
| 780.2 Syncope_and_collapse                              | Symptoms             |

|                                                      |          |
|------------------------------------------------------|----------|
| 780.39 Other_convulsions                             | Symptoms |
| 780.4 Dizziness_and_giddiness                        | Symptoms |
| 780.52 Insomnia,_unspecified                         | Symptoms |
| 780.53 Hypersomnia_with_sleep_apnea,_unspecified     | Symptoms |
| 780.57 Unspecified_sleep_apnea                       | Symptoms |
| 780.6 Fever,_unspecified                             | Symptoms |
| 780.79 Other_malaise_and_fatigue                     | Symptoms |
| 780.93 Memory_loss                                   | Symptoms |
| 781 Abnormal_involuntary_movements                   | Symptoms |
| 781.2 Abnormality_of_gait                            | Symptoms |
| 782 Disturbance_of_skin_sensation                    | Symptoms |
| 782.1 Rash_and_other_nonspecific_skin_eruption       | Symptoms |
| 782.3 Edema                                          | Symptoms |
| 783.1 Abnormal_weight_gain                           | Symptoms |
| 783.21 Loss_of_weight                                | Symptoms |
| 784 Headache                                         | Symptoms |
| 784.2 Swelling,_mass,_or_lump_in_head_and_neck       | Symptoms |
| 784.7 Epistaxis                                      | Symptoms |
| 785 Tachycardia,_unspecified                         | Symptoms |
| 785.1 Palpitations                                   | Symptoms |
| 785.2 Undiagnosed_cardiac_murmurs                    | Symptoms |
| 785.6 Enlargement_of_lymph_nodes                     | Symptoms |
| 785.9 Other_symptoms_involving_cardiovascular_system | Symptoms |
| 786.05 Shortness_of_breath                           | Symptoms |
| 786.07 Wheezing                                      | Symptoms |
| 786.09 Other_respiratory_abnormalities               | Symptoms |
| 786.2 Cough                                          | Symptoms |
| 786.5 Chest_pain,_unspecified                        | Symptoms |
| 786.59 Other_chest_pain                              | Symptoms |



|                                                             |                     |
|-------------------------------------------------------------|---------------------|
| 786.6 Swelling,_mass,_or_lump_in_chest                      | Symptoms            |
| 786.9 Other_symptoms_involving_respiratory_system_and_chest | Symptoms            |
| 787.01 Nausea_with_vomiting                                 | Symptoms            |
| 787.02 Nausea_alone                                         | Symptoms            |
| 787.1 Heartburn                                             | Symptoms            |
| 787.2 Dysphagia                                             | Symptoms            |
| 787.2 Dysphagia,_unspecified                                | Symptoms            |
| 787.91 Diarrhea                                             | Symptoms            |
| 788.1 Dysuria                                               | Symptoms            |
| 788.2 Retention_of_urine,_unspecified                       | Symptoms            |
| 788.21 Incomplete_bladder_emptying                          | Symptoms            |
| 788.3 Urinary_incontinence,_unspecified                     | Symptoms            |
| 788.31 Urge_incontinence                                    | Symptoms            |
| 788.33 Mixed_incontinence_(male)_(female)                   | Symptoms            |
| 788.41 Urinary_frequency                                    | Symptoms            |
| 788.43 Nocturia                                             | Symptoms            |
| 788.63 Urgency_of_urination                                 | Symptoms            |
| 789 Abdominal_pain,_unspecified_site                        | Symptoms            |
| 789.01 Abdominal_pain,_right_upper_quadrant                 | Symptoms            |
| 789.03 Abdominal_pain,_right_lower_quadrant                 | Symptoms            |
| 789.04 Abdominal_pain,_left_lower_quadrant                  | Symptoms            |
| 789.06 Abdominal_pain,_epigastric                           | Symptoms            |
| 789.07 Abdominal_pain,_generalized                          | Symptoms            |
| 789.09 Abdominal_pain,_other_specified_site                 | Symptoms            |
| 79.99 Unspecified_viral_infection                           | Infectious_Diseases |
| 790.21 Impaired_fasting_glucose                             | Symptoms            |
| 790.29 Other_abnormal_glucose                               | Symptoms            |
| 790.4 LDH]                                                  | Symptoms            |

|                                                                                      |                      |
|--------------------------------------------------------------------------------------|----------------------|
| 790.5 Other_nonspecific_abnormal_serum_enzyme_levels                                 | Symptoms             |
| 790.6 Other_abnormal_blood_chemistry                                                 | Symptoms             |
| 791 Proteinuria                                                                      | Symptoms             |
| 793.11 Solitary_pulmonary_nodule                                                     | Symptoms             |
| 794.31 Nonspecific_abnormal_electrocardiogram_[ECG]_[EKG]                            | Symptoms             |
| 794.39 Other_nonspecific_abnormal_results_of_function_study_of_cardiovascular_system | Symptoms             |
| 794.8 Nonspecific_abnormal_results_of_function_study_of_liver                        | Symptoms             |
| 795.79 Other_and_unspecified_nonspecific_immunological_findings                      | Symptoms             |
| 796.2 Elevated_blood_pressure_reading_without_diagnosis_of_hypertension              | Symptoms             |
| 799.02 Hypoxemia                                                                     | Symptoms             |
| 8.45 Intestinal_infection_due_to_Clostridium_difficile                               | Infectious_Diseases  |
| 813.42 Other_closed_fractures_of_distal_end_of_radius_(alone)                        | Injury_And_Poisoning |
| 824.8 Unspecified_fracture_of_ankle,_closed                                          | Injury_And_Poisoning |
| 825.25 Closed_fracture_of_metatarsal_bone(s)                                         | Injury_And_Poisoning |
| 840.4 Rotator_cuff_(capsule)_sprain                                                  | Injury_And_Poisoning |
| 845 Sprain_of_ankle,_unspecified_site                                                | Injury_And_Poisoning |
| 846 Sprain_of_lumbosacral_(joint)_(ligament)                                         | Injury_And_Poisoning |
| 847 Sprain_of_neck                                                                   | Injury_And_Poisoning |
| Open_wound_of_tooth_(broken)_(fractured)_(due_to_trauma),_without_mention            |                      |
| 873.63 _of_complication                                                              | Injury_And_Poisoning |
| Open_wound_of_knee,_leg_[except_thigh],_and_ankle,_without_mention_of_com            |                      |
| 891 plication                                                                        | Injury_And_Poisoning |
| 995.3 Allergy,_unspecified,_not_elsewhere_classified                                 | Injury_And_Poisoning |
| 998.59 Other_postoperative_infection                                                 | Injury_And_Poisoning |
